# Supplementary material
Source: PubMed Central journal article supplement (PMC3167204)
Supplement: NIHMS317854-supplement-Supplement.pdf [file NIHMS317854-supplement-Supplement.pdf]

# Bioassay Ontology Annotations facilitate Cross-Analysis of Diverse High-throughput Screening Data Sets

Stephan C. Schürer<sup>\*,1,2</sup>, Uma Vempati<sup>1</sup>, Robin Smith<sup>1</sup>, Mark Southern<sup>3</sup>, Vance Lemmon<sup>1,4</sup>

<sup>1</sup> Center for Computational Science, University of Miami. <sup>2</sup> Department of Molecular and Cellular Pharmacology, Miller School of Medicine, University of Miami. <sup>3</sup> The Scripps Research Molecular Screening Center, The Scripps Research Institute, Jupiter, FL. <sup>4</sup> The Miami Project to Cure Paralysis, Department of Neurological Surgery, Miller School of Medicine, University of Miami.

\* to whom correspondence should be addressed: [sschurer@med.miami.edu](mailto:sschurer@med.miami.edu)

## Supporting Material

### Contents:

|           |            |
|-----------|------------|
| Figure S1 | Page 2     |
| Figure S2 | Page 3     |
| Figure S3 | Page 4     |
| Figure S4 | Page 5     |
| Figure S5 | Page 6     |
| Figure S6 | Page 7     |
| Figure S7 | Page 8     |
| Figure S8 | Page 9     |
| Table S1  | Page 10-27 |
| Table S2  | Page 28-38 |
| Table S3  | Page 39-41 |

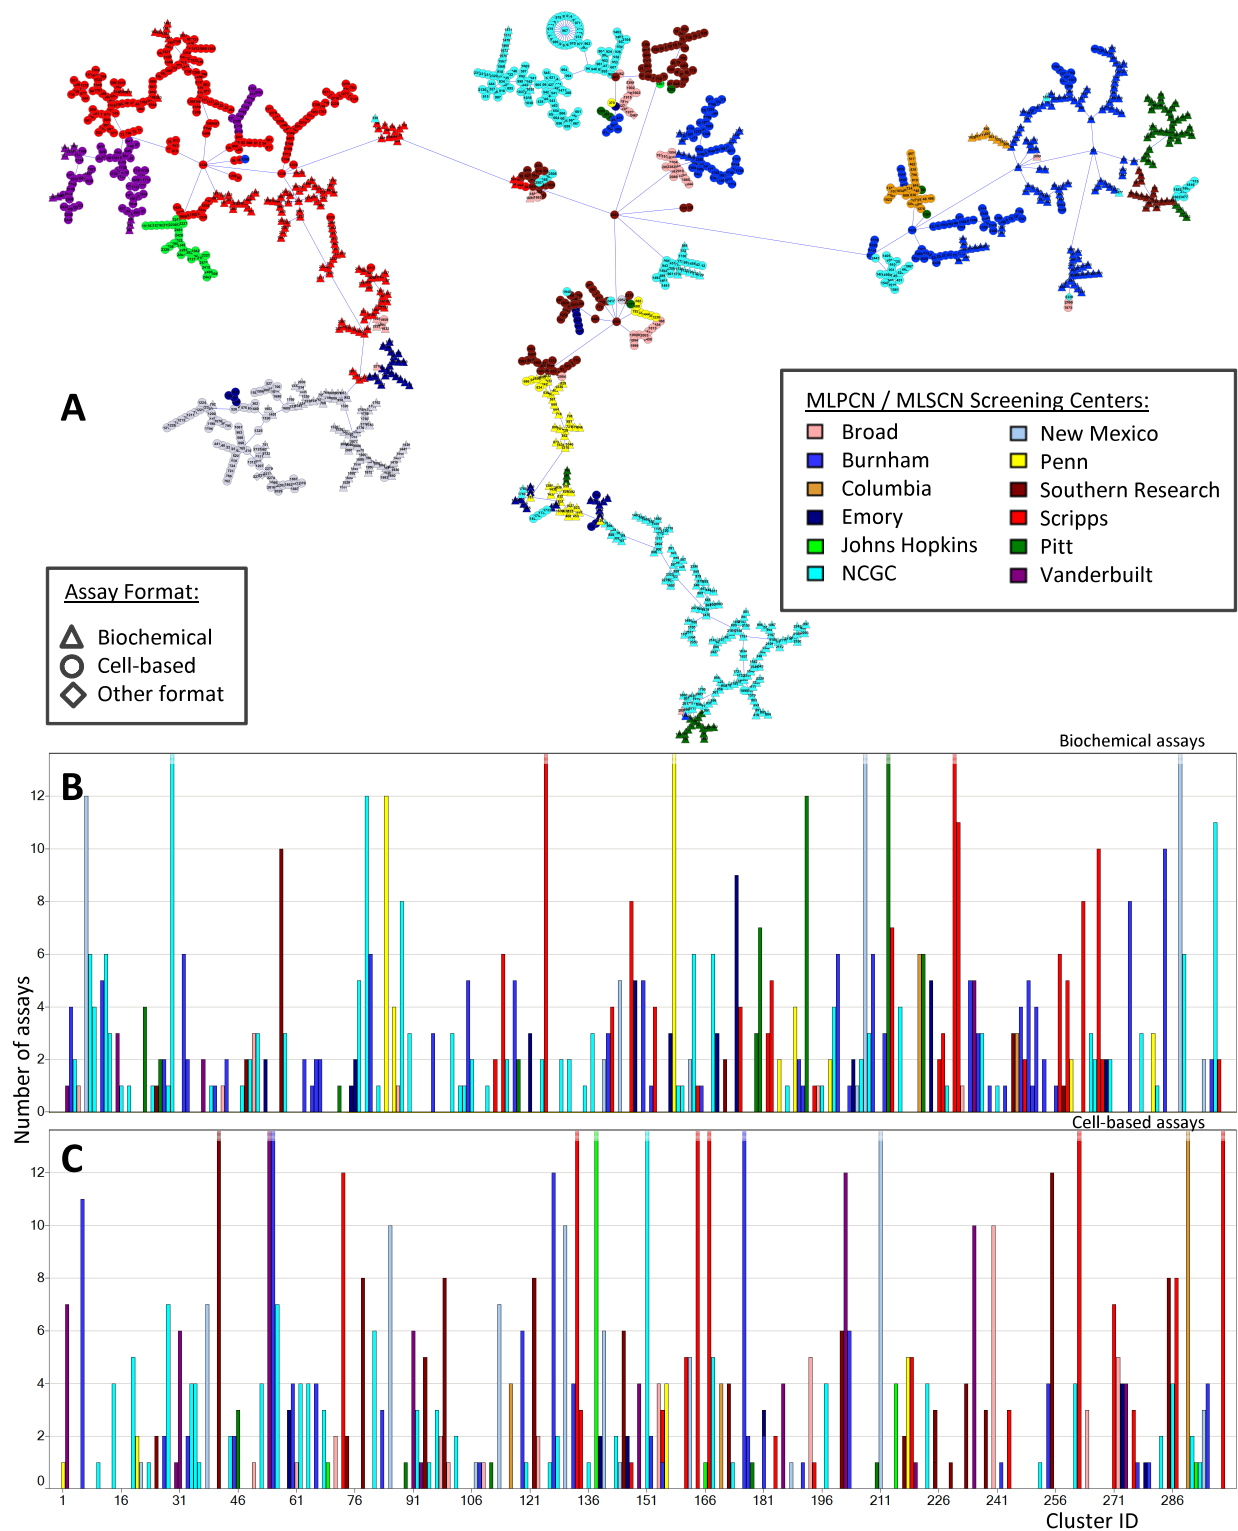

**Figure S1:** Clustering of 1,498 PubChem Assays deposited by the MLPCN and MLSCN screening centers (only assays with data and no summary assays as of April 2010). A) Minimum Spanning Tree (MST) visualization of the assays. The MST was generated from the similarity matrix, which was computed based on text fingerprints derived from the key textual fields of PubChem assays using the Tanimoto metric (see text). Nodes are colored by screening centers and shaped by assay format. B) and C) Assay clusters and number of assay members per cluster computed by maximum dissimilarity clustering based on text fingerprints as above (see text); note that the order of clusters is not related to how similar the clusters are to each other. B) biochemical assays, C) cell-based assays. 1,486 assays are shown. Bars are colored by screening center.

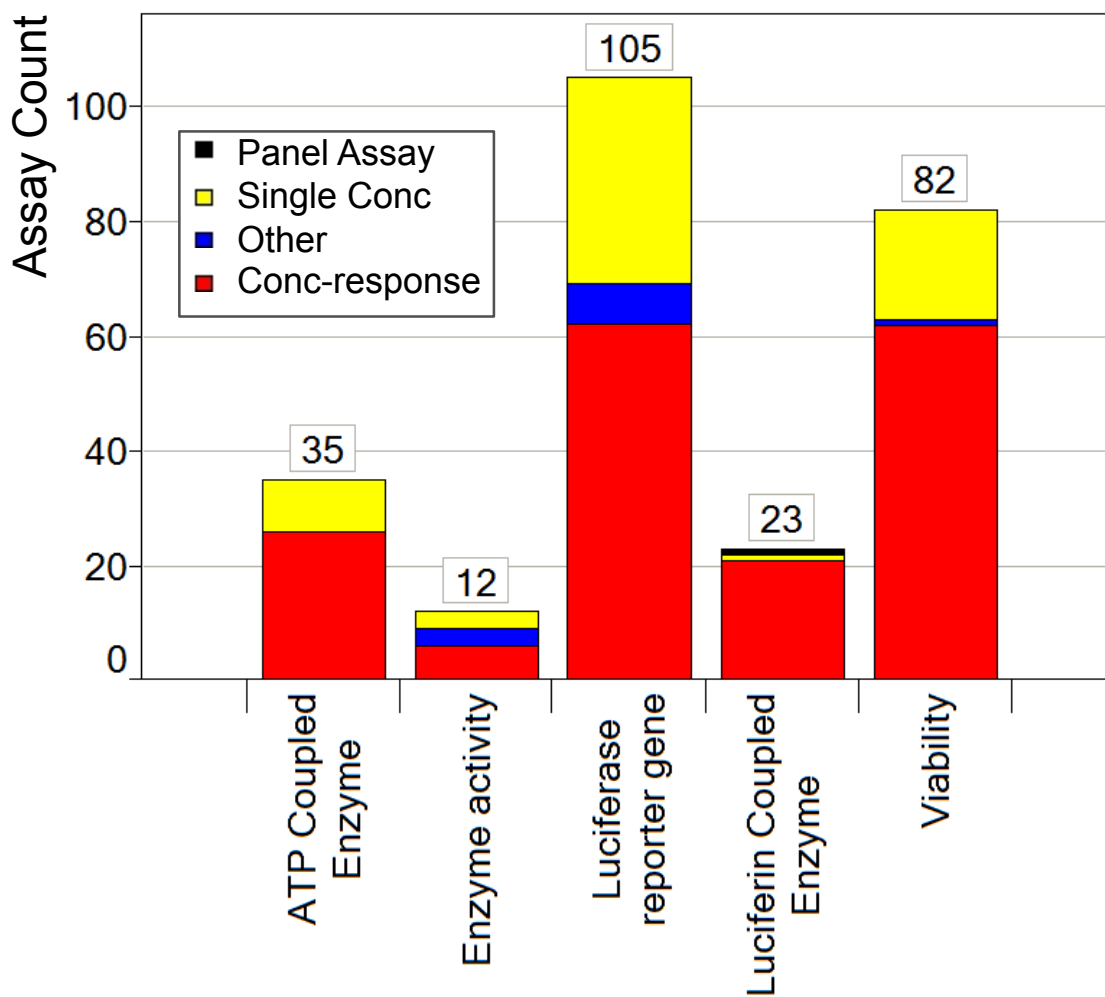

**Figure S2:** Major luciferase assay technologies (by assay type) as annotated in PubChem as of April 2010.

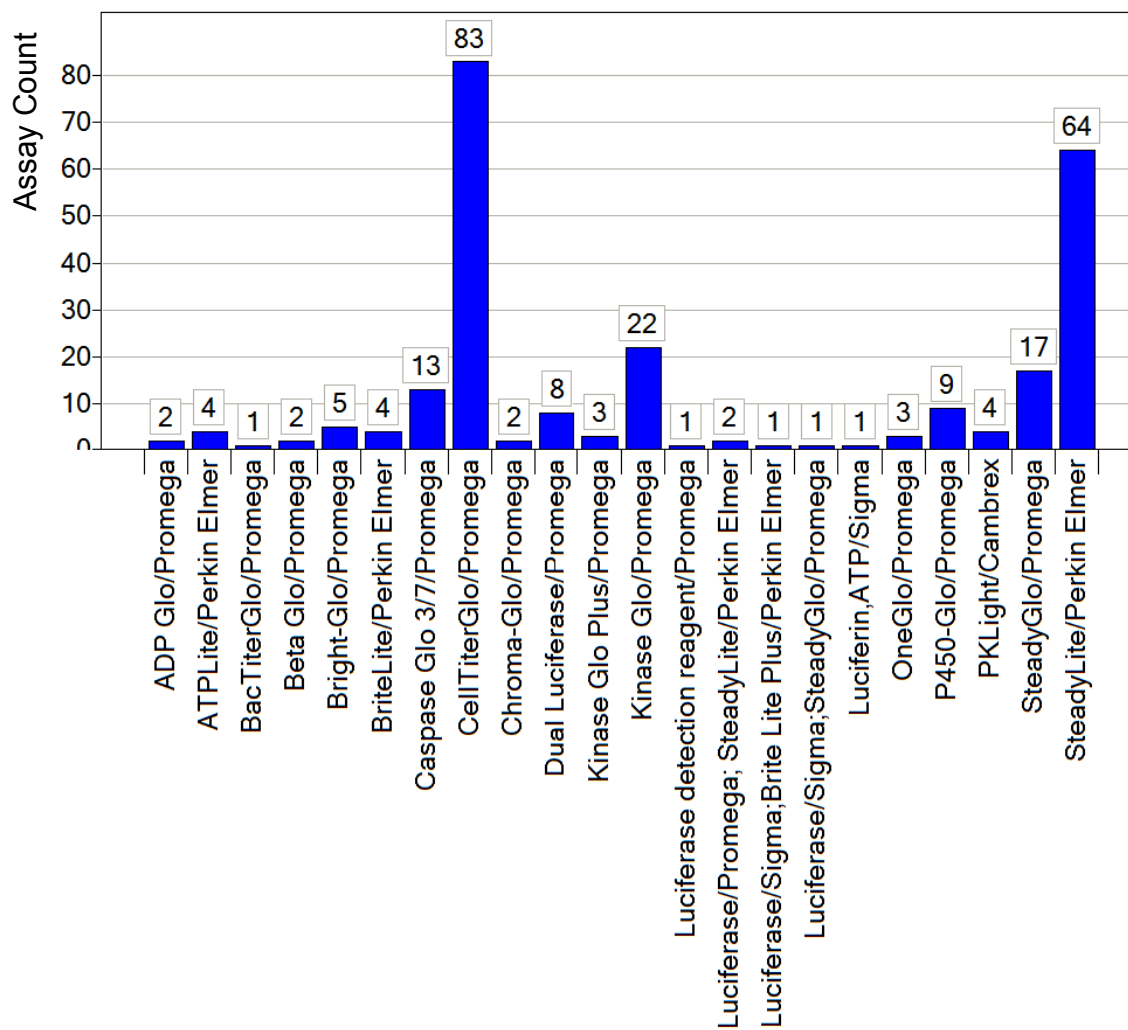

**Figure S3:** Luciferase assay kits (annotated from PubChem April 2010; 5 assays from the luciferase reporter gene category in Figure S2 above are not annotated).

$$PCIdx = \frac{N(\text{Active})}{N(\text{Tested})} \quad (N: \text{ assays count})$$

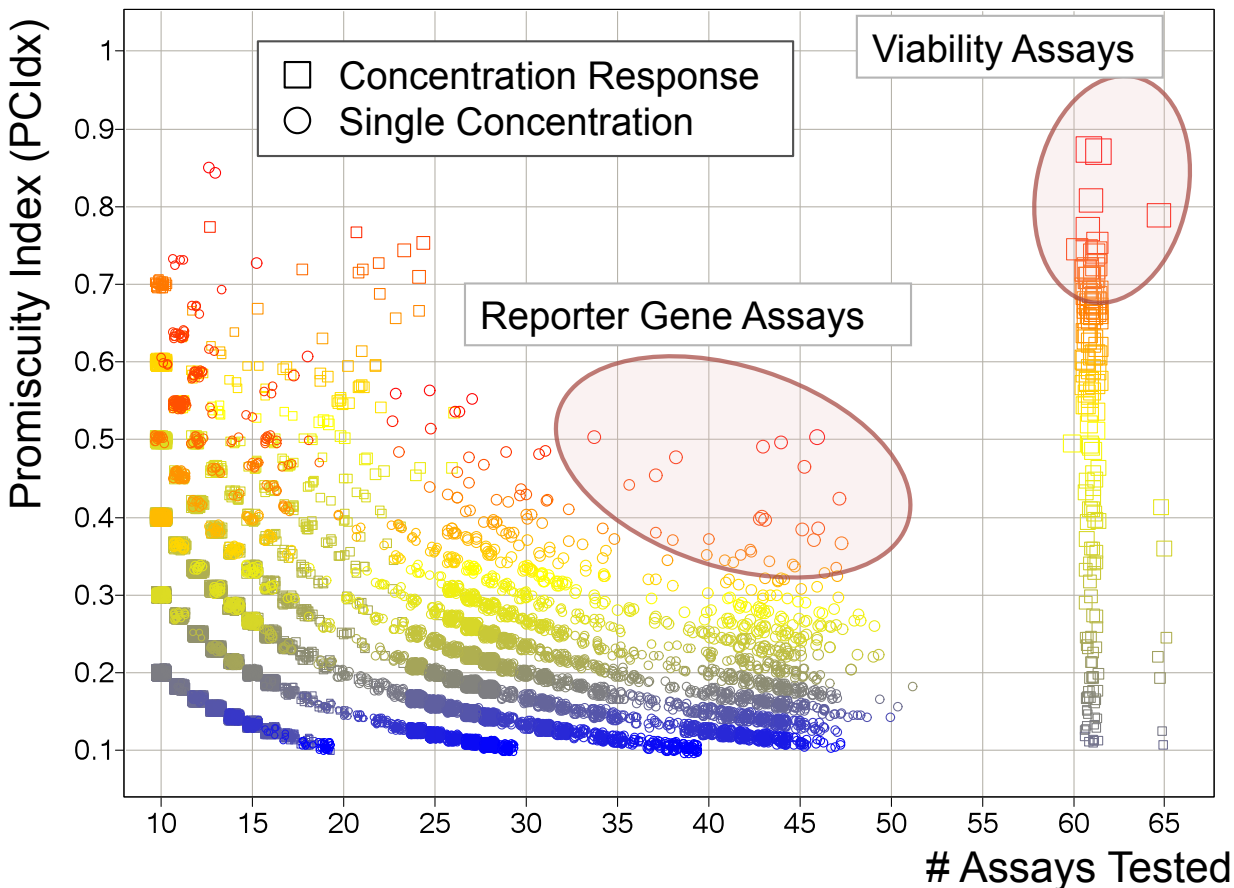

**Figure S4:** Scatter plot of luciferase assay promiscuity Index (PCIdx) vs. the number of luciferase assays in which each compounds was tested. PCIdx was calculated independently for concentration response and single concentration assays (based on PubChem luciferase assays as of April 2010). 15,080 data points shown: at least ten assays tested, PCIdx  $\geq$  0.1, at least done active assay (compounds can overlap between single concentration and concentration response). The size of each circle or square is proportional to number of assays in which the compound is active. The color indicates the Pareto front computed by maximizing PCIdx and the number of active assays.

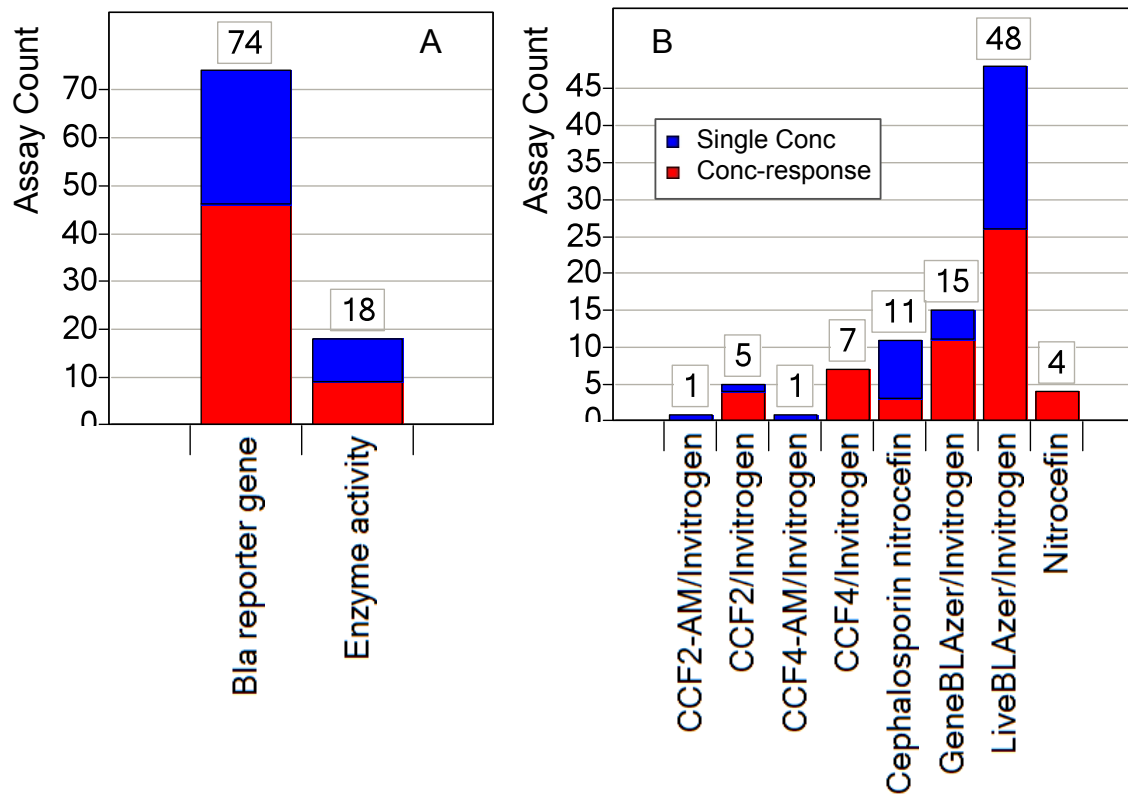

**Figure S5:**  $\beta$ -lactamase assay technology sub-categories (A) and assay kits (B) as annotated from PubChem as of April 2010. Single concentration assays are shown in blue and concentration-response assays in red.

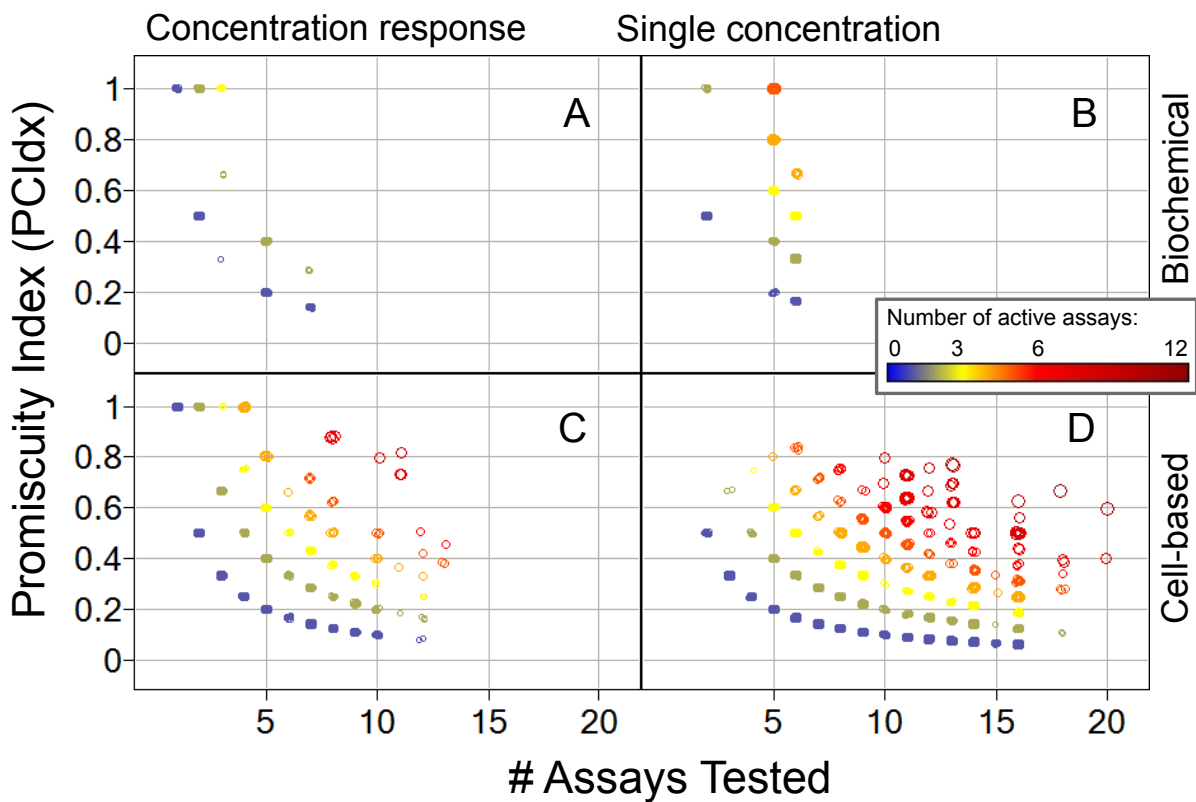

**Figure S6.** Compound promiscuity for  $\beta$ -lactamase assay technologies. Promiscuity Index vs. number of tested assays as calculated from PubChem assays. A,B: enzyme activity (biochemical format); C,D: beta-lactamase reporter gene assays (cell-based). A,C: concentration-response assays; B,D: single concentration assays. Color and size indicate the number of assays (of each format) in which a compound is active. 14,275 data points with at least one active assay shown: A: 1,408, B: 3,704, C: 9,163, D: 5,457.

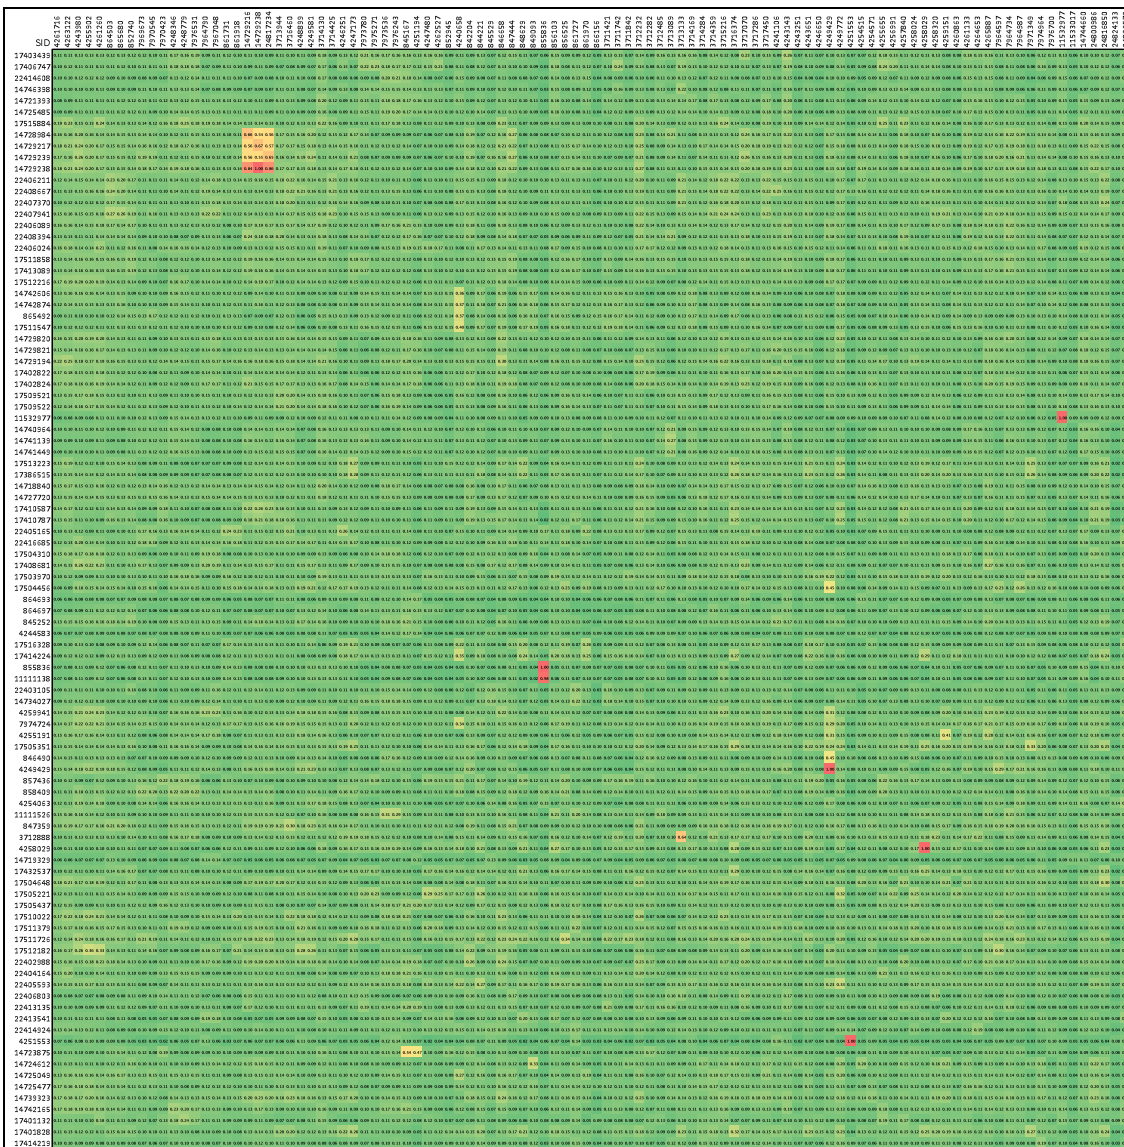

**Figure S7.** Full Tanimoto similarity matrix of the most promiscuous  $\beta$ -lactamase reporter gene compounds (97, rows) vs. most promiscuous luciferase reporter gene compounds (102, columns). Color scale from green (similarity 0) via yellow (similarity 0.5) to red (similarity 1.0). Tanimoto similarities were computed using ECFP4 fingerprints. Most promiscuous compounds were defined based on PCIdx  $\geq 0.5$  and a minimum of 10 assays in which they were tested.



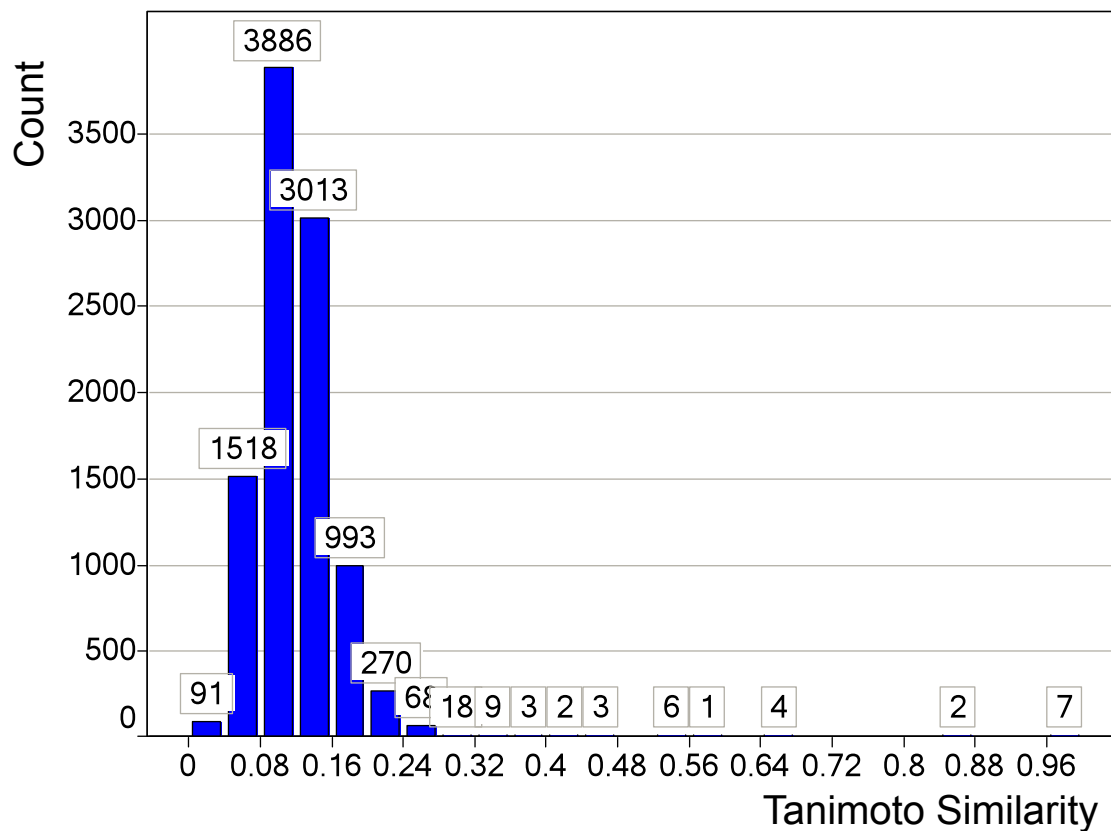

**Figure S8.** Histogram of all pair-wise Tanimoto similarities of the 102 most promiscuous luciferase reporter gene compounds compared against the 97 most promiscuous beta-lactamase reporter gene compounds. Tanimoto similarities were computed using ECFP4 fingerprints. Most promiscuous compounds were defined as those with  $PCIdx \geq 0.5$  and which were tested in at least 10 assays. See Figure S7 for the full similarity matrix.



|                                                                                    |          |      |   |    |      |   |    |      |   |   |      |      |    |      |      |   |      |      |   |      |      |   |      |      |   |      |      |   |      |      |   |   |
|------------------------------------------------------------------------------------|----------|------|---|----|------|---|----|------|---|---|------|------|----|------|------|---|------|------|---|------|------|---|------|------|---|------|------|---|------|------|---|---|
| 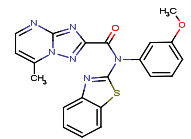    | 22408963 | 0.71 | 5 | 7  | 0.39 | 7 | 18 |      |   |   |      | 0.00 | 0  | 5    | 0.00 | 0 | 1    | 0.00 | 0 | 2    | 0.00 | 0 | 5    | 0.00 | 0 | 3    | 0.00 | 0 | 5    | 0.00 | 0 | 3 |
|    | 4240859  | 0.56 | 5 | 9  | 0.27 | 6 | 22 |      |   |   |      | 0.00 | 0  | 10   | 0.00 | 0 | 1    | 0.00 | 0 | 2    | 0.00 | 0 | 5    | 0.00 | 0 | 7    | 0.00 | 0 | 5    | 0.00 | 0 | 7 |
|    | 4241106  | 0.50 | 5 | 10 | 0.23 | 5 | 22 |      |   |   |      | 0.00 | 0  | 11   | 0.00 | 0 | 2    | 0.00 | 0 | 2    | 0.00 | 0 | 6    | 0.00 | 0 | 5    | 0.00 | 0 | 6    | 0.00 | 0 | 5 |
|    | 17510448 | 0.83 | 5 | 6  | 0.38 | 6 | 16 |      |   |   |      | 0.00 | 0  | 6    | 0.00 | 0 | 1    | 0.00 | 0 | 2    | 0.00 | 0 | 5    | 0.00 | 0 | 3    | 0.00 | 0 | 5    | 0.00 | 0 | 3 |
|    | 17411011 | 0.71 | 5 | 7  | 0.33 | 6 | 18 |      |   |   |      | 0.00 | 0  | 6    | 0.00 | 0 | 1    | 0.00 | 0 | 2    | 0.00 | 0 | 5    | 0.00 | 0 | 5    | 0.00 | 0 | 5    | 0.00 | 0 | 5 |
|    | 17416324 | 0.71 | 5 | 7  | 0.33 | 6 | 18 |      |   |   |      | 0.00 | 0  | 6    | 0.00 | 0 | 1    | 0.00 | 0 | 2    | 0.00 | 0 | 5    | 0.00 | 0 | 5    | 0.00 | 0 | 5    | 0.00 | 0 | 5 |
|  | 11533037 | 0.78 | 7 | 9  | 0.33 | 6 | 18 | 0.00 | 0 | 1 | 0.00 | 0    | 6  | 0.00 | 0    | 1 | 0.00 | 0    | 2 | 0.00 | 0    | 5 | 0.00 | 0    | 3 | 0.00 | 0    | 5 | 0.00 | 0    | 3 |   |
|  | 7969004  | 0.63 | 5 | 8  | 0.29 | 7 | 24 | 0.00 | 0 | 1 | 0.08 | 1    | 13 | 0.00 | 0    | 2 | 0.00 | 0    | 2 | 0.00 | 0    | 5 | 0.00 | 0    | 7 | 0.00 | 0    | 5 | 0.00 | 0    | 7 |   |
|  | 4254515  | 0.80 | 8 | 10 | 0.38 | 9 | 24 |      |   |   |      | 0.10 | 1  | 10   | 0.00 | 0 | 2    | 0.00 | 0 | 2    | 0.00 | 0 | 6    | 0.00 | 0 | 7    | 0.00 | 0 | 6    | 0.00 | 0 | 7 |

|                                                                                     |          |      |   |    |      |   |    |      |   |   |      |   |    |      |   |   |      |   |   |      |   |   |      |   |   |      |   |   |      |   |   |
|-------------------------------------------------------------------------------------|----------|------|---|----|------|---|----|------|---|---|------|---|----|------|---|---|------|---|---|------|---|---|------|---|---|------|---|---|------|---|---|
| 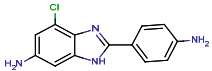     | 852945   | 0.75 | 9 | 12 | 0.33 | 8 | 24 | 0.00 | 0 | 1 | 0.11 | 1 | 9  | 0.00 | 0 | 2 | 0.00 | 0 | 2 | 0.00 | 0 | 6 | 0.00 | 0 | 7 | 0.00 | 0 | 6 | 0.00 | 0 | 7 |
|     | 857677   | 0.38 | 5 | 13 | 0.23 | 5 | 22 |      |   |   | 0.10 | 1 | 10 | 0.00 | 0 | 3 | 0.00 | 0 | 2 | 0.00 | 0 | 6 | 0.00 | 0 | 7 | 0.00 | 0 | 6 | 0.00 | 0 | 7 |
|     | 4257844  | 0.43 | 6 | 14 | 0.24 | 6 | 25 | 0.00 | 0 | 1 | 0.10 | 1 | 10 | 0.00 | 0 | 2 | 0.00 | 0 | 2 | 0.00 | 0 | 6 | 0.00 | 0 | 7 | 0.00 | 0 | 6 | 0.00 | 0 | 7 |
|    | 4243143  | 0.50 | 5 | 10 | 0.26 | 6 | 23 | 0.00 | 0 | 3 | 0.14 | 1 | 7  | 0.00 | 0 | 2 | 0.00 | 0 | 2 | 0.00 | 0 | 6 | 0.00 | 0 | 7 | 0.00 | 0 | 6 | 0.00 | 0 | 7 |
|    | 862811   | 0.42 | 5 | 12 | 0.29 | 6 | 21 | 0.00 | 0 | 1 | 0.20 | 2 | 10 | 0.00 | 0 | 2 | 0.00 | 0 | 2 | 0.00 | 0 | 6 | 0.00 | 0 | 7 | 0.00 | 0 | 6 | 0.00 | 0 | 7 |
|     | 3714359  | 0.50 | 5 | 10 | 0.32 | 8 | 25 |      |   |   | 0.22 | 2 | 9  | 0.00 | 0 | 2 | 0.00 | 0 | 2 | 0.00 | 0 | 6 | 0.00 | 0 | 6 | 0.00 | 0 | 6 | 0.00 | 0 | 6 |
|   | 17387416 | 0.86 | 6 | 7  | 0.28 | 5 | 18 |      |   |   | 0.33 | 2 | 6  | 0.00 | 0 | 1 | 0.00 | 0 | 2 | 0.00 | 0 | 5 | 0.00 | 0 | 5 | 0.00 | 0 | 5 | 0.00 | 0 | 5 |
|   | 17504263 | 0.83 | 5 | 6  | 0.32 | 6 | 19 |      |   |   | 0.43 | 3 | 7  | 0.00 | 0 | 1 | 0.00 | 0 | 2 | 0.00 | 0 | 5 | 0.00 | 0 | 3 | 0.00 | 0 | 5 | 0.00 | 0 | 3 |
|  | 3712992  | 0.47 | 7 | 15 | 0.41 | 9 | 22 | 0.00 | 0 | 1 | 0.00 | 0 | 10 | 0.00 | 0 | 3 | 0.00 | 0 | 3 | 0.00 | 0 | 6 | 0.13 | 1 | 8 | 0.00 | 0 | 6 | 0.13 | 1 | 8 |

|                                                                                    |          |      |    |    |      |    |    |      |   |   |      |   |    |      |   |   |      |   |   |      |   |   |      |   |   |      |   |   |      |   |   |
|------------------------------------------------------------------------------------|----------|------|----|----|------|----|----|------|---|---|------|---|----|------|---|---|------|---|---|------|---|---|------|---|---|------|---|---|------|---|---|
| 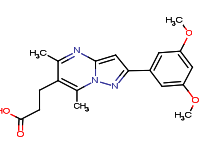    | 7964987  | 0.70 | 7  | 10 | 0.35 | 6  | 17 |      |   |   | 0.00 | 0 | 8  | 0.00 | 0 | 3 | 0.00 | 0 | 2 | 0.00 | 0 | 5 | 0.17 | 1 | 6 | 0.00 | 0 | 5 | 0.17 | 1 | 6 |
|    | 14722725 | 0.75 | 6  | 8  | 0.44 | 7  | 16 | 0.00 | 0 | 1 | 0.00 | 0 | 9  | 0.00 | 0 | 2 | 0.00 | 0 | 3 | 0.00 | 0 | 6 | 0.33 | 2 | 6 | 0.00 | 0 | 6 | 0.33 | 2 | 6 |
|    | 3712282  | 0.64 | 7  | 11 | 0.38 | 9  | 24 |      |   |   | 0.00 | 0 | 12 | 0.33 | 1 | 3 | 0.00 | 0 | 2 | 0.00 | 0 | 6 | 0.20 | 1 | 5 | 0.00 | 0 | 6 | 0.20 | 1 | 5 |
|    | 3714130  | 0.73 | 8  | 11 | 0.41 | 9  | 22 | 0.00 | 0 | 1 | 0.00 | 0 | 9  | 0.33 | 1 | 3 | 0.00 | 0 | 3 | 0.00 | 0 | 6 | 0.25 | 2 | 8 | 0.00 | 0 | 6 | 0.25 | 2 | 8 |
|    | 4249429  | 0.75 | 9  | 12 | 0.42 | 10 | 24 |      |   |   | 0.08 | 1 | 13 | 0.33 | 1 | 3 | 0.00 | 0 | 3 | 0.00 | 0 | 7 | 0.25 | 2 | 8 | 0.00 | 0 | 7 | 0.25 | 2 | 8 |
|    | 856604   | 0.42 | 5  | 12 | 0.28 | 7  | 25 | 0.00 | 0 | 1 | 0.00 | 0 | 10 | 0.50 | 1 | 2 | 0.00 | 0 | 2 | 0.00 | 0 | 6 | 0.00 | 0 | 7 | 0.00 | 0 | 6 | 0.00 | 0 | 7 |
|  | 4247173  | 0.50 | 5  | 10 | 0.20 | 5  | 25 |      |   |   | 0.00 | 0 | 10 | 0.50 | 1 | 2 | 0.00 | 0 | 2 | 0.00 | 0 | 6 | 0.00 | 0 | 7 | 0.00 | 0 | 6 | 0.00 | 0 | 7 |
|  | 842526   | 0.75 | 6  | 8  | 0.24 | 5  | 21 |      |   |   | 0.00 | 0 | 10 | 0.50 | 1 | 2 | 0.00 | 0 | 2 | 0.00 | 0 | 6 | 0.00 | 0 | 7 | 0.00 | 0 | 6 | 0.00 | 0 | 7 |
|  | 865680   | 0.81 | 13 | 16 | 0.36 | 8  | 22 | 0.00 | 0 | 1 | 0.00 | 0 | 10 | 0.33 | 1 | 3 | 0.00 | 0 | 2 | 0.00 | 0 | 6 | 0.00 | 0 | 7 | 0.00 | 0 | 6 | 0.00 | 0 | 7 |

|                                                                                    |          |      |   |    |      |   |    |      |   |      |      |    |      |      |   |      |      |   |      |      |   |      |      |   |      |      |   |      |      |   |   |
|------------------------------------------------------------------------------------|----------|------|---|----|------|---|----|------|---|------|------|----|------|------|---|------|------|---|------|------|---|------|------|---|------|------|---|------|------|---|---|
| 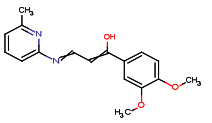    | 858623   | 0.67 | 6 | 9  | 0.22 | 5 | 23 | 0.00 | 0 | 1    | 0.00 | 0  | 10   | 0.50 | 1 | 2    | 0.00 | 0 | 2    | 0.17 | 1 | 6    | 0.00 | 0 | 7    | 0.17 | 1 | 6    | 0.00 | 0 | 7 |
|    | 24785323 | 0.83 | 5 | 6  | 0.32 | 6 | 19 |      |   | 0.67 | 4    | 6  | 0.00 | 0    | 1 | 0.00 | 0    | 2 | 0.00 | 0    | 5 | 0.00 | 0    | 3 | 0.00 | 0    | 5 | 0.00 | 0    | 3 |   |
|    | 24802966 | 1.00 | 5 | 5  | 0.35 | 6 | 17 |      |   | 0.83 | 5    | 6  | 0.00 | 0    | 1 | 0.00 | 0    | 2 | 0.00 | 0    | 5 | 0.00 | 0    | 3 | 0.00 | 0    | 5 | 0.00 | 0    | 3 |   |
|    | 24803318 | 1.00 | 5 | 5  | 0.37 | 7 | 19 |      |   | 0.83 | 5    | 6  | 0.00 | 0    | 1 | 0.00 | 0    | 2 | 0.00 | 0    | 5 | 0.00 | 0    | 3 | 0.00 | 0    | 5 | 0.00 | 0    | 3 |   |
|    | 24817414 | 0.71 | 5 | 7  | 0.43 | 6 | 14 | 0.00 | 0 | 1    | 0.80 | 4  | 5    | 0.00 | 0 | 1    | 0.00 | 0 | 2    | 0.00 | 0 | 5    | 0.50 | 1 | 2    | 0.00 | 0 | 5    | 0.50 | 1 | 2 |
|    | 24817234 | 0.71 | 5 | 7  | 0.53 | 8 | 15 | 0.50 | 1 | 2    | 0.83 | 5  | 6    | 0.00 | 0 | 1    | 0.00 | 0 | 2    | 0.00 | 0 | 5    | 0.50 | 1 | 2    | 0.00 | 0 | 5    | 0.50 | 1 | 2 |
|  | 7964734  | 0.55 | 6 | 11 | 0.24 | 6 | 25 | 0.00 | 0 | 1    | 0.08 | 1  | 12   | 0.00 | 0 | 2    | 0.33 | 1 | 3    | 0.00 | 0 | 5    | 0.25 | 2 | 8    | 0.00 | 0 | 5    | 0.25 | 2 | 8 |
|  | 4265887  | 0.58 | 7 | 12 | 0.29 | 7 | 24 |      |   | 0.00 | 0    | 10 | 0.00 | 0    | 2 | 0.67 | 2    | 3 | 0.00 | 0    | 6 | 0.25 | 2    | 8 | 0.00 | 0    | 6 | 0.25 | 2    | 8 |   |
|  | 4258189  | 0.63 | 5 | 8  | 0.33 | 7 | 21 |      |   | 0.00 | 0    | 13 | 0.00 | 0    | 2 | 0.67 | 2    | 3 | 0.00 | 0    | 6 | 0.25 | 2    | 8 | 0.00 | 0    | 6 | 0.25 | 2    | 8 |   |

|                                                                                    |          |      |   |    |      |    |    |      |   |   |      |   |      |      |      |      |      |      |      |      |      |      |      |      |      |      |      |      |      |      |      |   |   |
|------------------------------------------------------------------------------------|----------|------|---|----|------|----|----|------|---|---|------|---|------|------|------|------|------|------|------|------|------|------|------|------|------|------|------|------|------|------|------|---|---|
| 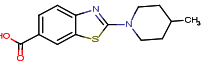    | 4243651  | 0.64 | 7 | 11 | 0.45 | 9  | 20 |      |   |   |      |   | 0.00 | 0    | 7    | 0.00 | 0    | 2    | 0.67 | 2    | 3    | 0.00 | 0    | 5    | 0.25 | 2    | 8    | 0.00 | 0    | 5    | 0.25 | 2 | 8 |
|   | 7970423  | 0.80 | 8 | 10 | 0.38 | 9  | 24 |      |   |   |      |   | 0.00 | 0    | 10   | 0.00 | 0    | 2    | 0.67 | 2    | 3    | 0.00 | 0    | 5    | 0.25 | 2    | 8    | 0.00 | 0    | 5    | 0.25 | 2 | 8 |
|    | 16953064 | 0.86 | 6 | 7  | 0.38 | 6  | 16 | 0.00 | 0 | 1 | 0.00 | 0 | 0    | 7    | 0.00 | 0    | 1    | 0.67 | 2    | 3    | 0.00 | 0    | 5    | 0.33 | 2    | 6    | 0.00 | 0    | 5    | 0.33 | 2    | 6 |   |
|    | 14743694 | 0.86 | 6 | 7  | 0.38 | 6  | 16 |      |   |   |      |   | 0.00 | 0    | 9    | 0.00 | 0    | 1    | 0.67 | 2    | 3    | 0.00 | 0    | 5    | 0.33 | 2    | 6    | 0.00 | 0    | 5    | 0.33 | 2 | 6 |
|   | 7969673  | 0.75 | 9 | 12 | 0.45 | 10 | 22 | 0.00 | 0 | 1 | 0.09 | 1 | 11   | 0.00 | 0    | 1    | 0.67 | 2    | 3    | 0.20 | 1    | 5    | 0.33 | 2    | 6    | 0.20 | 1    | 5    | 0.33 | 2    | 6    |   |   |
|   | 24795161 | 0.63 | 5 | 8  | 0.47 | 7  | 15 | 0.00 | 0 | 1 | 0.00 | 0 | 5    | 0.00 | 0    | 1    | 0.67 | 2    | 3    | 0.00 | 0    | 5    | 0.50 | 2    | 4    | 0.00 | 0    | 5    | 0.50 | 2    | 4    |   |   |
|  | 845167   | 0.64 | 7 | 11 | 0.39 | 9  | 23 |      |   |   |      |   | 0.33 | 4    | 12   | 0.00 | 0    | 2    | 0.00 | 0    | 2    | 0.25 | 2    | 8    | 0.67 | 4    | 6    | 0.25 | 2    | 8    | 0.67 | 4 | 6 |
|  | 14726526 | 0.71 | 5 | 7  | 0.35 | 6  | 17 |      |   |   |      |   | 0.67 | 6    | 9    | 0.00 | 0    | 1    | 0.33 | 1    | 3    | 0.11 | 1    | 9    | 0.80 | 4    | 5    | 0.11 | 1    | 9    | 0.80 | 4 | 5 |
|  | 864503   | 0.50 | 5 | 10 | 0.22 | 5  | 23 |      |   |   |      |   | 0.00 | 0    | 11   | 0.50 | 1    | 2    | 0.50 | 1    | 2    | 0.00 | 0    | 6    | 0.00 | 0    | 7    | 0.00 | 0    | 6    | 0.00 | 0 | 7 |

|                                                                                    |         |      |    |    |      |   |    |      |   |   |      |   |    |      |   |   |      |   |   |      |   |   |      |   |   |      |   |   |      |   |   |
|------------------------------------------------------------------------------------|---------|------|----|----|------|---|----|------|---|---|------|---|----|------|---|---|------|---|---|------|---|---|------|---|---|------|---|---|------|---|---|
| 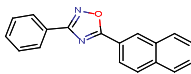    | 4247480 | 0.50 | 5  | 10 | 0.25 | 7 | 28 |      |   |   | 0.00 | 0 | 8  | 0.50 | 1 | 2 | 0.50 | 1 | 2 | 0.17 | 1 | 6 | 0.00 | 0 | 7 | 0.17 | 1 | 6 | 0.00 | 0 | 7 |
|    | 857381  | 0.56 | 5  | 9  | 0.23 | 5 | 22 |      |   |   | 0.00 | 0 | 13 | 0.50 | 1 | 2 | 0.50 | 1 | 2 | 0.17 | 1 | 6 | 0.00 | 0 | 7 | 0.17 | 1 | 6 | 0.00 | 0 | 7 |
|    | 3714857 | 0.56 | 5  | 9  | 0.27 | 6 | 22 | 0.00 | 0 | 1 | 0.00 | 0 | 7  | 0.50 | 1 | 2 | 0.50 | 1 | 2 | 0.17 | 1 | 6 | 0.00 | 0 | 7 | 0.17 | 1 | 6 | 0.00 | 0 | 7 |
|    | 860618  | 0.75 | 6  | 8  | 0.25 | 5 | 20 | 0.00 | 0 | 1 | 0.00 | 0 | 8  | 0.50 | 1 | 2 | 0.50 | 1 | 2 | 0.17 | 1 | 6 | 0.00 | 0 | 5 | 0.17 | 1 | 6 | 0.00 | 0 | 5 |
|    | 4261716 | 0.77 | 10 | 13 | 0.46 | 6 | 13 |      |   |   | 0.00 | 0 | 5  | 0.50 | 1 | 2 | 0.50 | 1 | 2 | 0.17 | 1 | 6 | 0.00 | 0 | 5 | 0.17 | 1 | 6 | 0.00 | 0 | 5 |
|    | 4263122 | 0.73 | 8  | 11 | 0.54 | 7 | 13 |      |   |   | 0.00 | 0 | 4  | 0.50 | 1 | 2 | 0.50 | 1 | 2 | 0.33 | 2 | 6 | 0.00 | 0 | 4 | 0.33 | 2 | 6 | 0.00 | 0 | 4 |
|  | 4243980 | 0.86 | 12 | 14 | 0.54 | 7 | 13 |      |   |   | 0.00 | 0 | 8  | 0.50 | 1 | 2 | 0.50 | 1 | 2 | 0.33 | 2 | 6 | 0.00 | 0 | 5 | 0.33 | 2 | 6 | 0.00 | 0 | 5 |
|  | 856103  | 0.73 | 8  | 11 | 0.22 | 5 | 23 | 0.00 | 0 | 1 | 0.20 | 2 | 10 | 0.50 | 1 | 2 | 0.50 | 1 | 2 | 0.33 | 2 | 6 | 0.00 | 0 | 7 | 0.33 | 2 | 6 | 0.00 | 0 | 7 |
|  | 4261133 | 0.70 | 7  | 10 | 0.38 | 8 | 21 |      |   |   | 0.00 | 0 | 10 | 0.50 | 1 | 2 | 0.33 | 1 | 3 | 0.00 | 0 | 6 | 0.25 | 2 | 8 | 0.00 | 0 | 6 | 0.25 | 2 | 8 |





|                                                                                    |         |      |    |    |      |   |    |      |   |   |      |   |    |      |   |   |      |   |   |      |   |   |      |   |   |      |   |   |      |   |   |
|------------------------------------------------------------------------------------|---------|------|----|----|------|---|----|------|---|---|------|---|----|------|---|---|------|---|---|------|---|---|------|---|---|------|---|---|------|---|---|
| 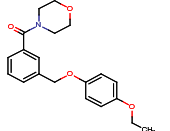    | 4261260 | 0.50 | 5  | 10 | 0.43 | 9 | 21 |      |   |   | 0.00 | 0 | 12 | 0.50 | 1 | 2 | 0.67 | 2 | 3 | 0.17 | 1 | 6 | 0.25 | 2 | 8 | 0.17 | 1 | 6 | 0.25 | 2 | 8 |
|    | 7976700 | 0.60 | 6  | 10 | 0.38 | 8 | 21 | 0.00 | 0 | 1 | 0.11 | 1 | 9  | 0.67 | 2 | 3 | 0.67 | 2 | 3 | 0.25 | 1 | 4 | 0.25 | 2 | 8 | 0.25 | 1 | 4 | 0.25 | 2 | 8 |
|    | 3716724 | 0.75 | 6  | 8  | 0.24 | 6 | 25 |      |   |   | 0.00 | 0 | 10 | 0.50 | 1 | 2 | 0.50 | 1 | 2 | 0.00 | 0 | 6 | 0.14 | 1 | 7 | 0.00 | 0 | 6 | 0.14 | 1 | 7 |
|    | 4248060 | 0.67 | 6  | 9  | 0.32 | 8 | 25 |      |   |   | 0.00 | 0 | 8  | 0.50 | 1 | 2 | 0.50 | 1 | 2 | 0.17 | 1 | 6 | 0.14 | 1 | 7 | 0.17 | 1 | 6 | 0.14 | 1 | 7 |
|    | 3715947 | 0.67 | 6  | 9  | 0.32 | 7 | 22 |      |   |   | 0.00 | 0 | 10 | 0.50 | 1 | 2 | 0.67 | 2 | 3 | 0.17 | 1 | 6 | 0.29 | 2 | 7 | 0.17 | 1 | 6 | 0.29 | 2 | 7 |
|    | 7973184 | 0.67 | 6  | 9  | 0.35 | 6 | 17 |      |   |   | 0.00 | 0 | 11 | 0.50 | 1 | 2 | 0.67 | 2 | 3 | 0.20 | 1 | 5 | 0.29 | 2 | 7 | 0.20 | 1 | 5 | 0.29 | 2 | 7 |
|  | 3716374 | 0.75 | 9  | 12 | 0.27 | 6 | 22 |      |   |   | 0.00 | 0 | 7  | 0.50 | 1 | 2 | 0.67 | 2 | 3 | 0.17 | 1 | 6 | 0.25 | 2 | 8 | 0.17 | 1 | 6 | 0.25 | 2 | 8 |
|  | 4257840 | 0.85 | 11 | 13 | 0.32 | 7 | 22 |      |   |   | 0.00 | 0 | 10 | 0.50 | 1 | 2 | 0.67 | 2 | 3 | 0.17 | 1 | 6 | 0.25 | 2 | 8 | 0.17 | 1 | 6 | 0.25 | 2 | 8 |
|  | 4262950 | 0.78 | 7  | 9  | 0.38 | 9 | 24 |      |   |   | 0.00 | 0 | 7  | 0.50 | 1 | 2 | 0.67 | 2 | 3 | 0.17 | 1 | 6 | 0.25 | 2 | 8 | 0.17 | 1 | 6 | 0.25 | 2 | 8 |

|                                                                                    |          |      |   |    |      |    |    |      |   |   |      |   |    |      |   |   |      |   |   |      |   |   |      |   |   |      |   |   |      |   |   |
|------------------------------------------------------------------------------------|----------|------|---|----|------|----|----|------|---|---|------|---|----|------|---|---|------|---|---|------|---|---|------|---|---|------|---|---|------|---|---|
| 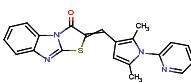    | 860541   | 0.75 | 6 | 8  | 0.35 | 6  | 17 | 0.00 | 0 | 1 | 0.00 | 0 | 12 | 0.50 | 1 | 2 | 0.67 | 2 | 3 | 0.17 | 1 | 6 | 0.29 | 2 | 7 | 0.17 | 1 | 6 | 0.29 | 2 | 7 |
|   | 858166   | 0.89 | 8 | 9  | 0.48 | 10 | 21 | 0.00 | 0 | 2 | 0.00 | 0 | 8  | 0.50 | 1 | 2 | 0.67 | 2 | 3 | 0.17 | 1 | 6 | 0.33 | 2 | 6 | 0.17 | 1 | 6 | 0.33 | 2 | 6 |
|    | 848269   | 0.56 | 5 | 9  | 0.27 | 6  | 22 |      |   |   | 0.00 | 0 | 8  | 0.50 | 1 | 2 | 0.67 | 2 | 3 | 0.33 | 2 | 6 | 0.29 | 2 | 7 | 0.33 | 2 | 6 | 0.29 | 2 | 7 |
|    | 4260301  | 0.63 | 5 | 8  | 0.27 | 6  | 22 |      |   |   | 0.00 | 0 | 13 | 0.50 | 1 | 2 | 0.67 | 2 | 3 | 0.33 | 2 | 6 | 0.25 | 2 | 8 | 0.33 | 2 | 6 | 0.25 | 2 | 8 |
|    | 847444   | 0.67 | 8 | 12 | 0.27 | 6  | 22 |      |   |   | 0.00 | 0 | 11 | 0.50 | 1 | 2 | 0.67 | 2 | 3 | 0.33 | 2 | 6 | 0.29 | 2 | 7 | 0.33 | 2 | 6 | 0.29 | 2 | 7 |
|    | 17407079 | 0.56 | 5 | 9  | 0.31 | 5  | 16 | 0.00 | 0 | 1 | 0.29 | 2 | 7  | 1.00 | 2 | 2 | 0.67 | 2 | 3 | 0.00 | 0 | 4 | 0.50 | 3 | 6 | 0.00 | 0 | 4 | 0.50 | 3 | 6 |
|  | 3714425  | 0.69 | 9 | 13 | 0.32 | 7  | 22 |      |   |   | 0.00 | 0 | 9  | 1.00 | 2 | 2 | 0.67 | 2 | 3 | 0.17 | 1 | 6 | 0.25 | 2 | 8 | 0.17 | 1 | 6 | 0.25 | 2 | 8 |
|  | 7972883  | 0.67 | 6 | 9  | 0.29 | 6  | 21 |      |   |   | 0.00 | 0 | 8  | 1.00 | 2 | 2 | 0.67 | 2 | 3 | 0.25 | 1 | 4 | 0.33 | 2 | 6 | 0.25 | 1 | 4 | 0.33 | 2 | 6 |
|  | 7974964  | 0.64 | 9 | 14 | 0.38 | 8  | 21 |      |   |   | 0.00 | 0 | 9  | 1.00 | 3 | 3 | 0.67 | 2 | 3 | 0.20 | 1 | 5 | 0.38 | 3 | 8 | 0.20 | 1 | 5 | 0.38 | 3 | 8 |

|                                                                                    |          |      |    |    |      |    |    |      |   |   |      |   |    |      |   |   |      |   |   |      |   |   |      |   |   |      |   |   |      |   |   |
|------------------------------------------------------------------------------------|----------|------|----|----|------|----|----|------|---|---|------|---|----|------|---|---|------|---|---|------|---|---|------|---|---|------|---|---|------|---|---|
| 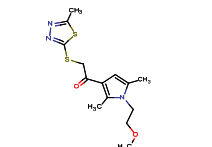    | 4254571  | 0.70 | 7  | 10 | 0.36 | 8  | 22 |      |   |   | 0.00 | 0 | 10 | 1.00 | 2 | 2 | 0.67 | 2 | 3 | 0.00 | 0 | 6 | 0.25 | 2 | 8 | 0.00 | 0 | 6 | 0.25 | 2 | 8 |
|    | 7976243  | 0.73 | 11 | 15 | 0.50 | 11 | 22 |      |   |   | 0.15 | 2 | 13 | 1.00 | 4 | 4 | 0.67 | 2 | 3 | 0.20 | 1 | 5 | 0.38 | 3 | 8 | 0.20 | 1 | 5 | 0.38 | 3 | 8 |
|    | 7973536  | 0.93 | 14 | 15 | 0.50 | 11 | 22 | 0.00 | 0 | 1 | 0.10 | 1 | 10 | 1.00 | 3 | 3 | 0.67 | 2 | 3 | 0.20 | 1 | 5 | 0.38 | 3 | 8 | 0.20 | 1 | 5 | 0.38 | 3 | 8 |
|    | 14731454 | 0.63 | 5  | 8  | 0.33 | 5  | 15 |      |   |   | 0.00 | 0 | 8  | 1.00 | 2 | 2 | 0.50 | 1 | 2 | 0.00 | 0 | 5 | 0.40 | 2 | 5 | 0.00 | 0 | 5 | 0.40 | 2 | 5 |
|    | 22408172 | 0.83 | 5  | 6  | 0.33 | 5  | 15 |      |   |   | 0.00 | 0 | 5  | 1.00 | 1 | 1 | 0.67 | 2 | 3 | 0.00 | 0 | 5 | 0.50 | 2 | 4 | 0.00 | 0 | 5 | 0.50 | 2 | 4 |
|    | 14732860 | 0.71 | 5  | 7  | 0.32 | 6  | 19 |      |   |   | 0.00 | 0 | 6  | 1.00 | 2 | 2 | 0.67 | 2 | 3 | 0.20 | 1 | 5 | 0.50 | 3 | 6 | 0.20 | 1 | 5 | 0.50 | 3 | 6 |
|   | 14744660 | 0.73 | 8  | 11 | 0.32 | 6  | 19 | 0.00 | 0 | 1 | 0.00 | 0 | 9  | 1.00 | 2 | 2 | 0.67 | 2 | 3 | 0.20 | 1 | 5 | 0.50 | 3 | 6 | 0.20 | 1 | 5 | 0.50 | 3 | 6 |
|  | 4255902  | 0.86 | 12 | 14 | 0.54 | 7  | 13 |      |   |   | 0.00 | 0 | 8  | 1.00 | 2 | 2 | 0.50 | 1 | 2 | 0.33 | 2 | 6 | 0.00 | 0 | 5 | 0.33 | 2 | 6 | 0.00 | 0 | 5 |
|  | 3717070  | 0.75 | 9  | 12 | 0.36 | 8  | 22 |      |   |   | 0.10 | 1 | 10 | 1.00 | 1 | 1 | 0.50 | 1 | 2 | 0.17 | 1 | 6 | 0.14 | 1 | 7 | 0.17 | 1 | 6 | 0.14 | 1 | 7 |

|                                                                                    |         |      |    |    |      |    |    |      |   |   |      |   |    |      |   |   |      |   |   |      |   |   |      |   |   |      |   |   |      |   |   |
|------------------------------------------------------------------------------------|---------|------|----|----|------|----|----|------|---|---|------|---|----|------|---|---|------|---|---|------|---|---|------|---|---|------|---|---|------|---|---|
| 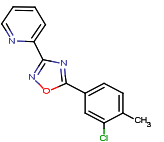    | 858954  | 0.67 | 6  | 9  | 0.39 | 9  | 23 |      |   |   | 0.00 | 0 | 11 | 1.00 | 2 | 2 | 0.50 | 1 | 2 | 0.33 | 2 | 6 | 0.14 | 1 | 7 | 0.33 | 2 | 6 | 0.14 | 1 | 7 |
|    | 4262527 | 0.73 | 8  | 11 | 0.48 | 11 | 23 | 0.00 | 0 | 1 | 0.00 | 0 | 11 | 1.00 | 2 | 2 | 0.67 | 2 | 3 | 0.33 | 2 | 6 | 0.25 | 2 | 8 | 0.33 | 2 | 6 | 0.25 | 2 | 8 |
|    | 3714284 | 0.79 | 11 | 14 | 0.43 | 10 | 23 | 0.00 | 0 | 1 | 0.00 | 0 | 10 | 1.00 | 2 | 2 | 0.67 | 2 | 3 | 0.33 | 2 | 6 | 0.25 | 2 | 8 | 0.33 | 2 | 6 | 0.25 | 2 | 8 |
|    | 7973780 | 0.90 | 9  | 10 | 0.45 | 10 | 22 | 0.00 | 0 | 1 | 0.20 | 2 | 10 | 1.00 | 2 | 2 | 0.67 | 2 | 3 | 0.40 | 2 | 5 | 0.38 | 3 | 8 | 0.40 | 2 | 5 | 0.38 | 3 | 8 |
|    | 7976305 | 0.38 | 5  | 13 | 0.33 | 7  | 21 |      |   |   | 0.00 | 0 | 9  | 1.00 | 3 | 3 | 0.67 | 2 | 3 | 0.40 | 2 | 5 | 0.25 | 2 | 8 | 0.40 | 2 | 5 | 0.25 | 2 | 8 |
|    | 4250396 | 0.63 | 5  | 8  | 0.32 | 7  | 22 |      |   |   | 0.00 | 0 | 8  | 1.00 | 1 | 1 | 0.67 | 2 | 3 | 0.33 | 2 | 6 | 0.25 | 2 | 8 | 0.33 | 2 | 6 | 0.25 | 2 | 8 |
|  | 4254716 | 0.67 | 6  | 9  | 0.36 | 8  | 22 |      |   |   | 0.00 | 0 | 10 | 1.00 | 2 | 2 | 0.67 | 2 | 3 | 0.33 | 2 | 6 | 0.25 | 2 | 8 | 0.33 | 2 | 6 | 0.25 | 2 | 8 |
|  | 3716902 | 0.56 | 5  | 9  | 0.23 | 5  | 22 |      |   |   | 0.00 | 0 | 7  | 1.00 | 2 | 2 | 0.67 | 2 | 3 | 0.33 | 2 | 6 | 0.25 | 2 | 8 | 0.33 | 2 | 6 | 0.25 | 2 | 8 |
|  | 4246650 | 0.58 | 7  | 12 | 0.32 | 7  | 22 |      |   |   | 0.00 | 0 | 12 | 1.00 | 2 | 2 | 0.67 | 2 | 3 | 0.40 | 2 | 5 | 0.33 | 2 | 6 | 0.40 | 2 | 5 | 0.33 | 2 | 6 |



|                                                                                    |          |      |   |    |      |   |    |      |   |   |      |   |    |      |   |   |      |   |   |      |   |   |      |   |   |      |   |   |      |   |   |
|------------------------------------------------------------------------------------|----------|------|---|----|------|---|----|------|---|---|------|---|----|------|---|---|------|---|---|------|---|---|------|---|---|------|---|---|------|---|---|
| 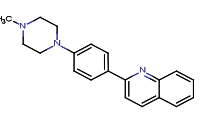    | 24821749 | 0.88 | 7 | 8  | 0.44 | 7 | 16 | 0.00 | 0 | 1 | 0.00 | 0 | 5  | 0.50 | 1 | 2 | 0.50 | 1 | 2 | 0.00 | 0 | 5 | 0.67 | 2 | 3 | 0.00 | 0 | 5 | 0.67 | 2 | 3 |
|    | 24818354 | 0.88 | 7 | 8  | 0.31 | 5 | 16 | 0.00 | 0 | 1 | 0.00 | 0 | 5  | 1.00 | 2 | 2 | 0.67 | 2 | 3 | 0.00 | 0 | 5 | 0.75 | 3 | 4 | 0.00 | 0 | 5 | 0.75 | 3 | 4 |
|    | 858305   | 0.78 | 7 | 9  | 0.33 | 6 | 18 | 0.00 | 0 | 1 | 0.00 | 0 | 7  | 1.00 | 2 | 2 | 1.00 | 1 | 1 | 1.00 | 1 | 1 | 0.50 | 3 | 6 | 1.00 | 1 | 1 | 0.50 | 3 | 6 |
|    | 7977601  | 0.45 | 5 | 11 | 0.32 | 8 | 25 | 1.00 | 1 | 1 | 0.25 | 3 | 12 | 0.00 | 0 | 2 | 0.00 | 0 | 2 | 0.00 | 0 | 5 | 0.00 | 0 | 7 | 0.00 | 0 | 5 | 0.00 | 0 | 7 |
|    | 14743125 | 0.56 | 5 | 9  | 0.29 | 5 | 17 | 1.00 | 2 | 2 | 0.13 | 1 | 8  | 0.00 | 0 | 1 | 0.00 | 0 | 2 | 0.00 | 0 | 5 | 0.00 | 0 | 5 | 0.00 | 0 | 5 | 0.00 | 0 | 5 |
|   | 4248779  | 0.62 | 8 | 13 | 0.32 | 7 | 22 | 1.00 | 1 | 1 | 0.17 | 1 | 6  | 0.00 | 0 | 2 | 0.00 | 0 | 2 | 0.00 | 0 | 6 | 0.00 | 0 | 5 | 0.00 | 0 | 6 | 0.00 | 0 | 5 |
|  | 3716460  | 0.50 | 5 | 10 | 0.29 | 7 | 24 | 1.00 | 1 | 1 | 0.31 | 4 | 13 | 0.00 | 0 | 3 | 0.00 | 0 | 3 | 0.14 | 1 | 7 | 0.25 | 2 | 8 | 0.14 | 1 | 7 | 0.25 | 2 | 8 |
|  | 22412622 | 0.71 | 5 | 7  | 0.42 | 8 | 19 | 1.00 | 1 | 1 | 0.33 | 2 | 6  | 0.00 | 0 | 1 | 0.00 | 0 | 3 | 0.00 | 0 | 4 | 0.25 | 1 | 4 | 0.00 | 0 | 4 | 0.25 | 1 | 4 |
|  | 866156   | 0.55 | 6 | 11 | 0.25 | 5 | 20 | 1.00 | 1 | 1 | 0.31 | 4 | 13 | 0.00 | 0 | 2 | 0.00 | 0 | 2 | 0.00 | 0 | 6 | 0.00 | 0 | 5 | 0.00 | 0 | 6 | 0.00 | 0 | 5 |

|                                                                                    |         |      |   |    |      |   |    |      |   |   |      |   |    |      |   |   |      |   |   |      |   |   |      |   |   |      |   |   |      |   |   |
|------------------------------------------------------------------------------------|---------|------|---|----|------|---|----|------|---|---|------|---|----|------|---|---|------|---|---|------|---|---|------|---|---|------|---|---|------|---|---|
| 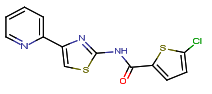    | 7970468 | 0.56 | 5 | 9  | 0.25 | 5 | 20 | 1.00 | 1 | 1 | 0.36 | 4 | 11 | 0.00 | 0 | 2 | 0.00 | 0 | 2 | 0.00 | 0 | 5 | 0.00 | 0 | 7 | 0.00 | 0 | 5 | 0.00 | 0 | 7 |
|    | 4258320 | 0.60 | 6 | 10 | 0.33 | 7 | 21 | 1.00 | 1 | 1 | 0.36 | 4 | 11 | 0.00 | 0 | 2 | 0.00 | 0 | 2 | 0.00 | 0 | 6 | 0.00 | 0 | 6 | 0.00 | 0 | 6 | 0.00 | 0 | 6 |
|    | 855944  | 0.63 | 5 | 8  | 0.38 | 6 | 16 | 1.00 | 1 | 1 | 0.40 | 4 | 10 | 0.00 | 0 | 2 | 0.00 | 0 | 2 | 0.00 | 0 | 5 | 0.00 | 0 | 4 | 0.00 | 0 | 5 | 0.00 | 0 | 4 |
|    | 855810  | 0.63 | 5 | 8  | 0.38 | 8 | 21 | 1.00 | 2 | 2 | 0.50 | 7 | 14 | 0.00 | 0 | 2 | 0.00 | 0 | 2 | 0.00 | 0 | 6 | 0.00 | 0 | 5 | 0.00 | 0 | 6 | 0.00 | 0 | 5 |
|    | 3711742 | 0.54 | 7 | 13 | 0.27 | 6 | 22 | 1.00 | 2 | 2 | 0.55 | 6 | 11 | 0.00 | 0 | 2 | 0.00 | 0 | 2 | 0.00 | 0 | 6 | 0.00 | 0 | 7 | 0.00 | 0 | 6 | 0.00 | 0 | 7 |
|    | 4240727 | 0.45 | 5 | 11 | 0.31 | 8 | 26 | 1.00 | 2 | 2 | 0.56 | 5 | 9  | 0.00 | 0 | 2 | 0.00 | 0 | 2 | 0.00 | 0 | 6 | 0.00 | 0 | 5 | 0.00 | 0 | 6 | 0.00 | 0 | 5 |
|  | 861129  | 0.45 | 5 | 11 | 0.30 | 7 | 23 | 1.00 | 1 | 1 | 0.58 | 7 | 12 | 0.00 | 0 | 2 | 0.00 | 0 | 2 | 0.00 | 0 | 6 | 0.00 | 0 | 7 | 0.00 | 0 | 6 | 0.00 | 0 | 7 |
|  | 861970  | 0.50 | 6 | 12 | 0.35 | 8 | 23 | 1.00 | 1 | 1 | 0.58 | 7 | 12 | 0.00 | 0 | 1 | 0.00 | 0 | 2 | 0.00 | 0 | 6 | 0.00 | 0 | 5 | 0.00 | 0 | 6 | 0.00 | 0 | 5 |
|  | 855543  | 0.75 | 6 | 8  | 0.38 | 6 | 16 | 1.00 | 1 | 1 | 0.40 | 4 | 10 | 0.00 | 0 | 2 | 0.00 | 0 | 2 | 0.00 | 0 | 5 | 0.00 | 0 | 4 | 0.00 | 0 | 5 | 0.00 | 0 | 4 |



|                                                                                    |          |      |    |    |      |   |    |      |   |   |      |   |    |      |   |   |      |   |   |      |   |   |      |   |   |      |   |   |      |   |   |
|------------------------------------------------------------------------------------|----------|------|----|----|------|---|----|------|---|---|------|---|----|------|---|---|------|---|---|------|---|---|------|---|---|------|---|---|------|---|---|
| 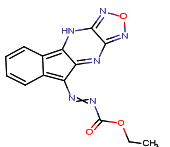    | 24781162 | 0.83 | 5  | 6  | 0.33 | 5 | 15 | 1.00 | 1 | 1 | 0.40 | 2 | 5  | 0.00 | 0 | 1 | 0.00 | 0 | 2 | 0.00 | 0 | 3 | 0.00 | 0 | 3 | 0.00 | 0 | 3 | 0.00 | 0 | 3 |
|    | 855836   | 0.91 | 10 | 11 | 0.43 | 9 | 21 | 1.00 | 2 | 2 | 0.50 | 6 | 12 | 0.00 | 0 | 2 | 0.00 | 0 | 2 | 0.00 | 0 | 6 | 0.00 | 0 | 5 | 0.00 | 0 | 6 | 0.00 | 0 | 5 |
|    | 856308   | 0.63 | 5  | 8  | 0.22 | 5 | 23 | 1.00 | 1 | 1 | 0.53 | 8 | 15 | 0.00 | 0 | 2 | 0.00 | 0 | 2 | 0.00 | 0 | 6 | 0.00 | 0 | 7 | 0.00 | 0 | 6 | 0.00 | 0 | 7 |
|    | 4265676  | 0.78 | 7  | 9  | 0.28 | 7 | 25 | 1.00 | 1 | 1 | 0.54 | 7 | 13 | 0.00 | 0 | 2 | 0.00 | 0 | 2 | 0.00 | 0 | 6 | 0.00 | 0 | 7 | 0.00 | 0 | 6 | 0.00 | 0 | 7 |
|    | 4246251  | 0.83 | 10 | 12 | 0.23 | 5 | 22 | 1.00 | 2 | 2 | 0.56 | 5 | 9  | 0.00 | 0 | 1 | 0.00 | 0 | 2 | 0.00 | 0 | 6 | 0.00 | 0 | 7 | 0.00 | 0 | 6 | 0.00 | 0 | 7 |
|    | 858637   | 0.88 | 7  | 8  | 0.29 | 6 | 21 | 1.00 | 1 | 1 | 0.54 | 7 | 13 | 0.00 | 0 | 2 | 0.00 | 0 | 2 | 0.00 | 0 | 6 | 0.00 | 0 | 7 | 0.00 | 0 | 6 | 0.00 | 0 | 7 |
|  | 3717286  | 0.64 | 9  | 14 | 0.35 | 8 | 23 | 1.00 | 2 | 2 | 0.64 | 7 | 11 | 0.00 | 0 | 2 | 0.00 | 0 | 2 | 0.00 | 0 | 6 | 0.00 | 0 | 7 | 0.00 | 0 | 6 | 0.00 | 0 | 7 |
|  | 861918   | 0.73 | 8  | 11 | 0.36 | 8 | 22 | 1.00 | 1 | 1 | 0.60 | 6 | 10 | 0.00 | 0 | 2 | 0.00 | 0 | 2 | 0.00 | 0 | 6 | 0.00 | 0 | 7 | 0.00 | 0 | 6 | 0.00 | 0 | 7 |
|  | 17416287 | 0.83 | 5  | 6  | 0.38 | 6 | 16 | 1.00 | 1 | 1 | 0.63 | 5 | 8  | 0.00 | 0 | 1 | 0.00 | 0 | 2 | 0.00 | 0 | 5 | 0.00 | 0 | 5 | 0.00 | 0 | 5 | 0.00 | 0 | 5 |

|                                                                                    |          |      |    |    |      |    |    |      |   |   |      |   |    |      |   |   |      |   |   |      |   |   |      |   |   |      |   |   |      |   |   |
|------------------------------------------------------------------------------------|----------|------|----|----|------|----|----|------|---|---|------|---|----|------|---|---|------|---|---|------|---|---|------|---|---|------|---|---|------|---|---|
| 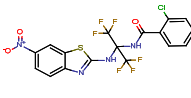    | 17513223 | 0.83 | 5  | 6  | 0.38 | 6  | 16 | 1.00 | 1 | 1 | 0.71 | 5 | 7  | 0.00 | 0 | 1 | 0.00 | 0 | 2 | 0.00 | 0 | 5 | 0.00 | 0 | 3 | 0.00 | 0 | 5 | 0.00 | 0 | 3 |
|    | 4258029  | 0.60 | 6  | 10 | 0.36 | 8  | 22 | 1.00 | 1 | 1 | 0.46 | 6 | 13 | 0.50 | 1 | 2 | 0.00 | 0 | 2 | 0.00 | 0 | 6 | 0.00 | 0 | 7 | 0.00 | 0 | 6 | 0.00 | 0 | 7 |
|    | 861731   | 0.50 | 6  | 12 | 0.28 | 7  | 25 | 0.33 | 1 | 3 | 0.56 | 5 | 9  | 0.00 | 0 | 2 | 0.00 | 0 | 2 | 0.00 | 0 | 6 | 0.00 | 0 | 7 | 0.00 | 0 | 6 | 0.00 | 0 | 7 |
|    | 7965596  | 0.45 | 5  | 11 | 0.41 | 9  | 22 | 0.33 | 1 | 3 | 0.53 | 8 | 15 | 0.00 | 0 | 2 | 0.00 | 0 | 2 | 0.00 | 0 | 5 | 0.00 | 0 | 7 | 0.00 | 0 | 5 | 0.00 | 0 | 7 |
|    | 861727   | 0.50 | 5  | 10 | 0.43 | 10 | 23 | 0.67 | 2 | 3 | 0.50 | 4 | 8  | 0.00 | 0 | 2 | 0.00 | 0 | 2 | 0.00 | 0 | 6 | 0.00 | 0 | 7 | 0.00 | 0 | 6 | 0.00 | 0 | 7 |
|    | 4251553  | 0.50 | 6  | 12 | 0.48 | 13 | 27 | 0.67 | 2 | 3 | 0.58 | 7 | 12 | 0.00 | 0 | 2 | 0.00 | 0 | 2 | 0.00 | 0 | 6 | 0.00 | 0 | 6 | 0.00 | 0 | 6 | 0.00 | 0 | 6 |
|   | 845529   | 0.71 | 10 | 14 | 0.56 | 15 | 27 | 0.50 | 2 | 4 | 0.55 | 6 | 11 | 0.00 | 0 | 2 | 0.00 | 0 | 2 | 0.00 | 0 | 6 | 0.00 | 0 | 5 | 0.00 | 0 | 6 | 0.00 | 0 | 5 |
|  | 3713089  | 0.67 | 8  | 12 | 0.42 | 11 | 26 | 0.60 | 3 | 5 | 0.55 | 6 | 11 | 0.00 | 0 | 2 | 0.00 | 0 | 2 | 0.00 | 0 | 5 | 0.00 | 0 | 7 | 0.00 | 0 | 5 | 0.00 | 0 | 7 |
|  | 24836573 | 0.80 | 8  | 10 | 0.39 | 7  | 18 | 0.67 | 2 | 3 | 0.57 | 4 | 7  | 0.00 | 0 | 1 | 0.00 | 0 | 2 | 0.00 | 0 | 5 | 0.00 | 0 | 3 | 0.00 | 0 | 5 | 0.00 | 0 | 3 |

|                                                                                    |          |      |    |    |      |    |    |      |   |   |      |   |    |      |   |      |      |   |      |      |   |      |      |   |      |      |   |      |      |   |   |
|------------------------------------------------------------------------------------|----------|------|----|----|------|----|----|------|---|---|------|---|----|------|---|------|------|---|------|------|---|------|------|---|------|------|---|------|------|---|---|
| 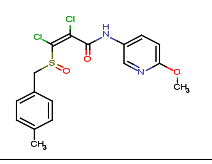    | 14729216 | 0.70 | 7  | 10 | 0.52 | 11 | 21 | 0.50 | 2 | 4 | 0.60 | 6 | 10 | 0.00 | 0 | 2    | 0.00 | 0 | 2    | 0.00 | 0 | 5    | 0.20 | 1 | 5    | 0.00 | 0 | 5    | 0.20 | 1 | 5 |
|    | 14729238 | 0.70 | 7  | 10 | 0.47 | 9  | 19 | 0.75 | 3 | 4 | 0.60 | 6 | 10 | 0.00 | 0 | 2    | 0.00 | 0 | 2    | 0.00 | 0 | 5    | 0.20 | 1 | 5    | 0.00 | 0 | 5    | 0.20 | 1 | 5 |
|    | 17514622 | 1.00 | 5  | 5  | 0.44 | 7  | 16 | 1.00 | 1 | 1 | 0.80 | 4 | 5  |      |   | 0.00 | 0    | 2 | 0.00 | 0    | 5 | 0.33 | 1    | 3 | 0.00 | 0    | 5 | 0.33 | 1    | 3 |   |
|    | 7964790  | 0.50 | 6  | 12 | 0.29 | 6  | 21 | 0.50 | 2 | 4 | 0.67 | 6 | 9  | 0.00 | 0 | 2    | 0.00 | 0 | 2    | 0.25 | 1 | 4    | 0.00 | 0 | 5    | 0.25 | 1 | 4    | 0.00 | 0 | 5 |
|    | 24807744 | 0.71 | 5  | 7  | 0.42 | 8  | 19 | 1.00 | 1 | 1 | 0.83 | 5 | 6  | 0.00 | 0 | 1    | 0.00 | 0 | 2    | 0.20 | 1 | 5    | 0.00 | 0 | 3    | 0.20 | 1 | 5    | 0.00 | 0 | 3 |
|   | 4256991  | 0.73 | 8  | 11 | 0.32 | 7  | 22 | 1.00 | 1 | 1 | 0.40 | 4 | 10 | 1.00 | 3 | 3    | 0.50 | 1 | 2    | 0.50 | 3 | 6    | 0.29 | 2 | 7    | 0.50 | 3 | 6    | 0.29 | 2 | 7 |
|  | 856525   | 0.79 | 11 | 14 | 0.48 | 11 | 23 | 1.00 | 1 | 1 | 0.58 | 7 | 12 | 1.00 | 3 | 3    | 0.67 | 2 | 3    | 0.33 | 2 | 6    | 0.38 | 3 | 8    | 0.33 | 2 | 6    | 0.38 | 3 | 8 |
|  | 4249772  | 0.73 | 8  | 11 | 0.43 | 10 | 23 | 1.00 | 1 | 1 | 0.67 | 6 | 9  | 1.00 | 3 | 3    | 0.67 | 2 | 3    | 0.50 | 3 | 6    | 0.38 | 3 | 8    | 0.50 | 3 | 6    | 0.38 | 3 | 8 |
|  | 3714169  | 0.82 | 9  | 11 | 0.45 | 10 | 22 | 1.00 | 1 | 1 | 0.64 | 7 | 11 | 1.00 | 3 | 3    | 0.67 | 2 | 3    | 0.50 | 3 | 6    | 0.38 | 3 | 8    | 0.50 | 3 | 6    | 0.38 | 3 | 8 |

**Table S2.** 97 compounds identified as most promiscuous in  $\beta$ -lactamase cell-based assays.

Compounds were clustered by maximum common substructure (compare to Figure 5).

| Structure                                                                           | Cluster Info |            |              | Single Concentration |        |        | Concentration-Response |        |        |
|-------------------------------------------------------------------------------------|--------------|------------|--------------|----------------------|--------|--------|------------------------|--------|--------|
|                                                                                     | SID          | Cluster ID | Cluster Size | PCIdx                | Active | Tested | PCIdx                  | Active | Tested |
| 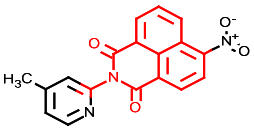    | 17403439     | 1          | 7            | 0.77                 | 10     | 13     | 1.00                   | 2      | 2      |
|    | 17406747     | 1          | 7            | 0.77                 | 10     | 13     | 1.00                   | 2      | 2      |
|    | 14725485     | 1          | 7            | 0.69                 | 9      | 13     | 0.50                   | 1      | 2      |
|   | 14721393     | 1          | 7            | 0.62                 | 8      | 13     |                        |        |        |
|  | 14746398     | 1          | 7            | 0.73                 | 8      | 11     |                        |        |        |
|  | 22414608     | 1          | 7            | 0.73                 | 8      | 11     |                        |        |        |
|   | 17515884     | 1          | 7            | 0.60                 | 6      | 10     |                        |        |        |
|   | 17402824     | 7          | 5            | 0.69                 | 9      | 13     | 0.75                   | 3      | 4      |

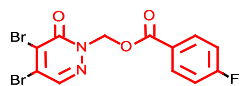

14729821

7

5

0.64

7

11

0.50

1

2

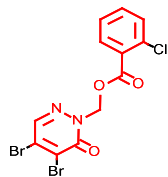

14729194

7

5

0.55

6

11

0.50

1

2

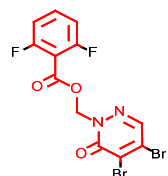

14729820

7

5

0.55

6

11

1.00

2

2

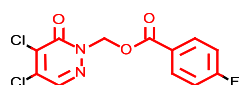

17402822

7

5

0.55

6

11

1.00

2

2

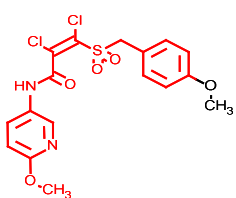

14729239

2

4

0.62

8

13

1.00

4

4

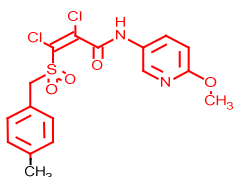

14728984

2

4

0.64

7

11

1.00

4

4

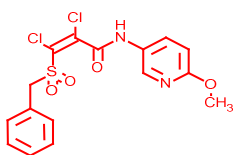

14729217

2

4

0.64

7

11

1.00

4

4

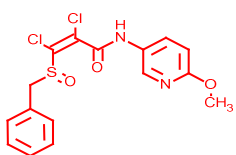

14729238

2

4

0.64

7

11

1.00

2

2

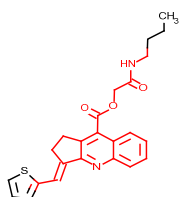

22408667

3

4

0.73

8

11

|                                                                                     |          |    |   |      |    |    |      |   |    |
|-------------------------------------------------------------------------------------|----------|----|---|------|----|----|------|---|----|
| 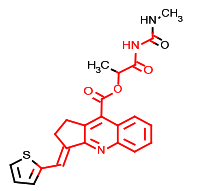    | 22407370 | 3  | 4 | 0.70 | 7  | 10 |      |   |    |
|    | 22406211 | 3  | 4 | 0.60 | 6  | 10 |      |   |    |
|    | 22407941 | 3  | 4 | 0.60 | 6  | 10 |      |   |    |
|    | 14742606 | 6  | 4 | 0.77 | 10 | 13 | 0.50 | 1 | 2  |
|   | 865492   | 6  | 4 | 0.50 | 8  | 16 | 0.73 | 8 | 11 |
|  | 17511547 | 6  | 4 | 0.73 | 8  | 11 |      |   |    |
|  | 14742874 | 6  | 4 | 0.64 | 7  | 11 |      |   |    |
|  | 845252   | 16 | 4 | 0.50 | 8  | 16 | 0.38 | 3 | 8  |
|  | 4244583  | 16 | 4 | 0.50 | 8  | 16 | 0.13 | 1 | 8  |

|                                                                                     |          |    |   |      |    |    |      |   |   |
|-------------------------------------------------------------------------------------|----------|----|---|------|----|----|------|---|---|
| 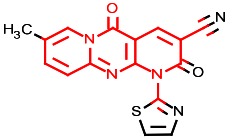    | 864693   | 16 | 4 | 0.50 | 7  | 14 | 0.17 | 1 | 6 |
|    | 864697   | 16 | 4 | 0.50 | 7  | 14 | 0.33 | 2 | 6 |
|    | 22408394 | 4  | 3 | 0.58 | 7  | 12 |      |   |   |
|     | 22406024 | 4  | 3 | 0.50 | 5  | 10 | 0.75 | 3 | 4 |
|   | 22406089 | 4  | 3 | 0.50 | 5  | 10 | 0.50 | 2 | 4 |
|  | 17413089 | 5  | 3 | 0.64 | 7  | 11 |      |   |   |
|   | 17512216 | 5  | 3 | 0.50 | 6  | 12 |      |   |   |
|  | 17511858 | 5  | 3 | 0.50 | 5  | 10 |      |   |   |
|  | 17509521 | 8  | 3 | 0.77 | 10 | 13 |      |   |   |

|                                                                                     |          |    |   |      |    |    |      |   |   |
|-------------------------------------------------------------------------------------|----------|----|---|------|----|----|------|---|---|
| 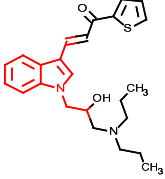    | 17509522 | 8  | 3 | 0.75 | 9  | 12 |      |   |   |
|    | 11532977 | 8  | 3 | 0.73 | 8  | 11 | 1.00 | 2 | 2 |
|    | 14741449 | 9  | 3 | 0.77 | 10 | 13 | 0.50 | 1 | 2 |
|    | 14740964 | 9  | 3 | 0.64 | 7  | 11 | 1.00 | 2 | 2 |
|   | 14741139 | 9  | 3 | 0.64 | 7  | 11 | 1.00 | 2 | 2 |
|   | 17513223 | 10 | 2 | 0.64 | 7  | 11 |      |   |   |
|   | 17386515 | 10 | 2 | 0.55 | 6  | 11 | 1.00 | 2 | 2 |
|  | 14727720 | 11 | 2 | 0.64 | 7  | 11 | 1.00 | 4 | 4 |
|  | 14718840 | 11 | 2 | 0.55 | 6  | 11 | 1.00 | 2 | 2 |



|                                                                                     |          |    |   |      |   |    |      |   |   |
|-------------------------------------------------------------------------------------|----------|----|---|------|---|----|------|---|---|
| 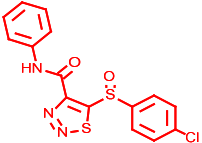    | 17410587 | 12 | 2 | 0.55 | 6 | 11 | 0.50 | 1 | 2 |
|    | 17410787 | 12 | 2 | 0.55 | 6 | 11 | 0.50 | 1 | 2 |
|    | 22405165 | 13 | 2 | 0.58 | 7 | 12 |      |   |   |
|    | 22416685 | 13 | 2 | 0.60 | 6 | 10 | 0.50 | 1 | 2 |
|   | 17408681 | 14 | 2 | 0.55 | 6 | 11 | 1.00 | 2 | 2 |
|  | 17504310 | 14 | 2 | 0.60 | 6 | 10 |      |   |   |
|   | 17504456 | 15 | 2 | 0.73 | 8 | 11 |      |   |   |
|  | 17503970 | 15 | 2 | 0.58 | 7 | 12 |      |   |   |
|   | 17414224 | 17 | 2 | 0.69 | 9 | 13 |      |   |   |

|                                                                                     |          |    |   |      |    |    |      |   |    |
|-------------------------------------------------------------------------------------|----------|----|---|------|----|----|------|---|----|
| 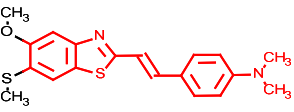    | 17516328 | 17 | 2 | 0.80 | 8  | 10 |      |   |    |
|     | 855836   | 18 | 2 | 0.63 | 10 | 16 | 0.60 | 3 | 5  |
|    | 11111138 | 18 | 2 |      |    |    | 0.50 | 6 | 12 |
|    | 14734027 | 19 | 2 | 0.55 | 6  | 11 | 1.00 | 2 | 2  |
|   | 22403105 | 19 | 2 | 0.50 | 5  | 10 | 0.00 | 0 | 2  |
|   | 7974724  | 20 | 2 | 0.60 | 12 | 20 | 0.33 | 2 | 6  |
|  | 4259941  | 20 | 2 | 0.50 | 8  | 16 | 0.73 | 8 | 11 |
|  | 4255191  | 21 | 2 | 0.50 | 8  | 16 | 0.50 | 4 | 8  |
|   | 17505351 | 21 | 2 | 0.60 | 6  | 10 |      |   |    |

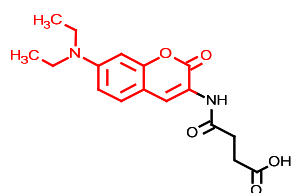

4249429

22

2

0.56

9

16

0.60

3

5

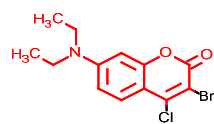

846490

22

2

0.50

8

16

0.71

5

7

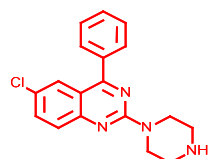

857436

23

1

0.67

12

18

0.18

2

11

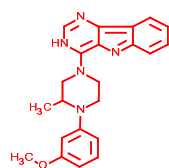

858409

24

1

0.10

1

10

0.82

9

11

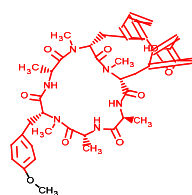

4254063

25

1

0.50

5

10

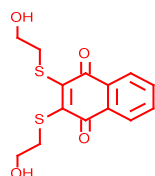

11111526

26

1

0.50

5

10

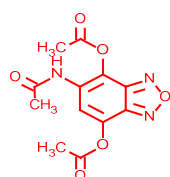

847359

27

1

0.50

7

14

0.80

8

10

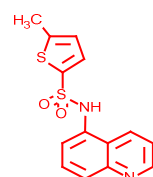

3712888

28

1

0.31

5

16

0.50

5

10

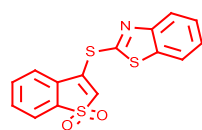

4258029

29

1

0.50

8

16

0.43

3

7

|                                                                                     |          |    |   |      |   |    |      |   |   |
|-------------------------------------------------------------------------------------|----------|----|---|------|---|----|------|---|---|
| 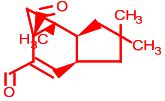   | 14719329 | 30 | 1 | 0.60 | 6 | 10 | 1.00 | 2 | 2 |
|     | 17432537 | 31 | 1 | 0.60 | 6 | 10 |      |   |   |
|    | 17504648 | 32 | 1 | 0.50 | 5 | 10 |      |   |   |
|    | 17505221 | 33 | 1 | 0.50 | 6 | 12 |      |   |   |
|   | 17505437 | 34 | 1 | 0.60 | 6 | 10 | 1.00 | 2 | 2 |
|   | 17510022 | 35 | 1 | 0.60 | 6 | 10 | 1.00 | 2 | 2 |
|  | 17511379 | 36 | 1 | 0.60 | 6 | 10 |      |   |   |
|  | 17511726 | 37 | 1 | 0.60 | 6 | 10 |      |   |   |
|   | 17512182 | 38 | 1 | 0.60 | 6 | 10 |      |   |   |

|                                                                                     |          |    |   |      |   |    |      |   |   |
|-------------------------------------------------------------------------------------|----------|----|---|------|---|----|------|---|---|
| 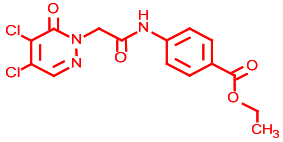     | 22402988 | 39 | 1 | 0.67 | 8 | 12 | 1.00 | 2 | 2 |
|    | 22404164 | 40 | 1 | 0.60 | 6 | 10 |      |   |   |
|     | 22405593 | 41 | 1 | 0.50 | 5 | 10 |      |   |   |
|    | 22406803 | 42 | 1 | 0.60 | 6 | 10 |      |   |   |
|   | 22413135 | 43 | 1 | 0.50 | 5 | 10 |      |   |   |
|  | 22413541 | 44 | 1 | 0.60 | 6 | 10 |      |   |   |
|  | 22414924 | 45 | 1 | 0.50 | 5 | 10 |      |   |   |
|   | 4251553  | 46 | 1 | 0.54 | 7 | 13 | 0.50 | 3 | 6 |
|  | 14723875 | 47 | 1 | 0.64 | 7 | 11 | 1.00 | 4 | 4 |

|                                                                                     |          |    |   |      |   |    |      |   |
|-------------------------------------------------------------------------------------|----------|----|---|------|---|----|------|---|
| 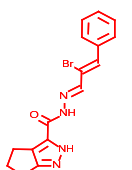    | 14724612 | 48 | 1 | 0.55 | 6 | 11 |      |   |
|     | 14725049 | 49 | 1 | 0.55 | 6 | 11 |      |   |
|    | 14725477 | 50 | 1 | 0.64 | 7 | 11 | 0.75 | 3 |
|    | 14739323 | 51 | 1 | 0.73 | 8 | 11 |      |   |
|   | 14742165 | 52 | 1 | 0.55 | 6 | 11 |      |   |
|  | 17401132 | 53 | 1 | 0.64 | 7 | 11 |      |   |
|   | 17401828 | 54 | 1 | 0.64 | 7 | 11 |      |   |
|   | 17414219 | 55 | 1 | 0.62 | 8 | 13 |      |   |

**Table S3.** MCS Clusters of compounds that were found promiscuous in both luciferase and  $\beta$ -lactamase reporter gene assays.

| Structure                                                                           | SID      | Cluster ID | Cluster Size | beta-Lactamase reporter |            |             |            | Luciferase reporter |            |             |            | Luciferase viability |            |             |            |
|-------------------------------------------------------------------------------------|----------|------------|--------------|-------------------------|------------|-------------|------------|---------------------|------------|-------------|------------|----------------------|------------|-------------|------------|
|                                                                                     |          |            |              | conc-response           |            | single conc |            | conc-response       |            | single conc |            | conc-response        |            | single conc |            |
|                                                                                     |          |            |              | PCIdx                   | Num Tested | PCIdx       | Num Tested | PCIdx               | Num Tested | PCIdx       | Num Tested | PCIdx                | Num Tested | PCIdx       | Num Tested |
| 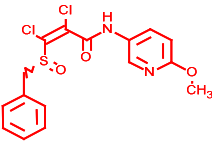   | 14729238 | 1          | 6            | 1                       | 2          | 0.64        | 11         | 0.70                | 10         | 0.47        | 19         | 0.75                 | 4          | 0.60        | 10         |
|    | 24817234 | 1          | 6            |                         |            | 0.50        | 4          | 0.71                | 7          | 0.53        | 15         | 0.50                 | 2          | 0.83        | 6          |
|    | 14729216 | 1          | 6            | 1                       | 4          | 0.56        | 9          | 0.70                | 10         | 0.52        | 21         | 0.50                 | 4          | 0.60        | 10         |
|    | 14729217 | 1          | 6            | 1                       | 4          | 0.64        | 11         | 0.75                | 4          | 0.26        | 19         |                      |            | 0.56        | 9          |
|  | 14728984 | 1          | 6            | 1                       | 4          | 0.64        | 11         | 0.75                | 4          | 0.13        | 15         |                      |            | 0.45        | 11         |
|  | 14729239 | 1          | 6            | 1                       | 4          | 0.62        | 13         | 0.75                | 4          | 0.06        | 16         |                      |            | 0.55        | 11         |

|                                                                                     |          |   |   |        |    |      |    |      |    |      |    |      |   |      |    |
|-------------------------------------------------------------------------------------|----------|---|---|--------|----|------|----|------|----|------|----|------|---|------|----|
| 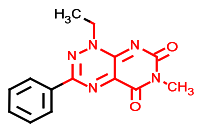    | 845167   | 2 | 3 | 0.625  | 8  | 0.42 | 12 | 0.64 | 11 | 0.39 | 23 |      |   | 0.33 | 12 |
|    | 14723875 | 2 | 3 | 1      | 4  | 0.64 | 11 | 0.14 | 7  | 0.35 | 17 |      |   | 0.60 | 10 |
|    | 4251194  | 2 | 3 | 0.6    | 5  | 0.57 | 7  | 0.50 | 8  | 0.60 | 10 | 1.00 | 1 | 1.00 | 2  |
|     | 4249429  | 5 | 3 | 0.6    | 5  | 0.56 | 16 | 0.75 | 12 | 0.42 | 24 |      |   | 0.08 | 13 |
|    | 846490   | 5 | 3 | 0.7143 | 7  | 0.50 | 16 | 0.00 | 5  | 0.05 | 22 |      |   | 0.27 | 11 |
|    | 17504456 | 5 | 3 |        |    | 0.73 | 11 | 0.00 | 3  | 0.00 | 11 |      |   | 0.00 | 5  |
|  | 3713133  | 3 | 2 | 0      | 2  | 0.36 | 14 | 0.80 | 10 | 0.05 | 22 | 0.00 | 1 | 0.36 | 11 |
|  | 3712888  | 3 | 2 | 0.5    | 10 | 0.31 | 16 | 0.78 | 9  | 0.19 | 21 | 0.00 | 1 | 0.29 | 7  |



|                                                                                     |          |    |   |        |    |      |    |      |    |      |    |      |   |      |    |
|-------------------------------------------------------------------------------------|----------|----|---|--------|----|------|----|------|----|------|----|------|---|------|----|
| 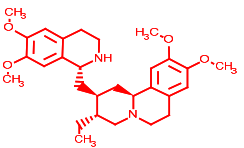     | 855836   | 4  | 2 | 0.6    | 5  | 0.63 | 16 | 0.91 | 11 | 0.43 | 21 | 1.00 | 2 | 0.50 | 12 |
|    | 11111138 | 4  | 2 | 0.5    | 12 |      |    | 0.33 | 3  |      |    |      |   |      |    |
|    | 4259151  | 6  | 2 | 0      | 2  | 0.00 | 14 | 0.50 | 10 | 0.09 | 22 |      |   | 0.00 | 10 |
|    | 4255191  | 6  | 2 | 0.5    | 8  | 0.50 | 16 | 0.17 | 6  | 0.00 | 22 |      |   | 0.00 | 10 |
|    | 4240658  | 7  | 2 | 0      | 2  | 0.00 | 14 | 0.58 | 12 | 0.16 | 25 |      |   | 0.25 | 8  |
|   | 17511547 | 7  | 2 |        |    | 0.73 | 11 | 0.00 | 3  | 0.00 | 15 | 1.00 | 1 | 0.20 | 5  |
|  | 11532977 | 8  | 1 | 1      | 2  | 0.73 | 11 | 0.33 | 6  | 0.50 | 18 |      |   | 0.71 | 7  |
|  | 4258029  | 9  | 1 | 0.4286 | 7  | 0.50 | 16 | 0.60 | 10 | 0.36 | 22 | 1.00 | 1 | 0.46 | 13 |
|   | 4251553  | 10 | 1 | 0.5    | 6  | 0.54 | 13 | 0.50 | 12 | 0.48 | 27 | 0.67 | 3 | 0.58 | 12 |
